# Supplementary material
Source: Royal Society of Chemistry journal article supplement (doi:10.1039/d6ob00245e)
Supplement: d6ob00245e1.pdf [file d6ob00245e1.pdf]

## Supporting information for “DHA-Like Polyunsaturated Ether Lipid: Modular Semi-Synthetic Approach and 15-Lipoxygenase-1 Substrate Activity”

Mina Bathen<sup>a</sup>, Svanur Sigurjónsson<sup>b</sup>, Karl E. Malterud<sup>a</sup>, Daniel H. Hasselstrøm<sup>a</sup>, Osman Gani<sup>a</sup>, Anders Vik<sup>a</sup>, Haraldur G. Guðmundsson<sup>\*b</sup>, Guðmundur G. Haraldsson<sup>b</sup> and Trond V. Hansen<sup>\*a</sup>

<sup>a</sup> Department of Pharmacy, Section for Pharmaceutical Chemistry, University of Oslo, P. O. Box 1068, 0316 Oslo, Norway. E-mail: t.v.hansen@farmasi.uio.no

<sup>b</sup> Science Institute, University of Iceland, Dunhaga 3, Reykjavik, 107, Iceland. E-mail: hgg@hi.is

### Table of contents:

|                                                    |    |
|----------------------------------------------------|----|
| Synthetic Protocols: .....                         | 2  |
| NMR and HRMS spectra: .....                        | 6  |
| Methods for molecular dynamic simulations .....    | 18 |
| Induced-Fit–refined complexes with 15-LOX-1 .....  | 19 |
| Docking poses with coordinating amino acids: ..... | 21 |
| Incubation studies with DHA-like MEL 3.....        | 23 |
| References: .....                                  | 25 |

## Synthetic Protocols:

### Synthesis of methyl 3-(3-((2Z,5Z,8Z,11Z,14Z)-heptadeca-2,5,8,11,14-pentaen-1-yl)oxiran-2-yl)propanoate (**9**)

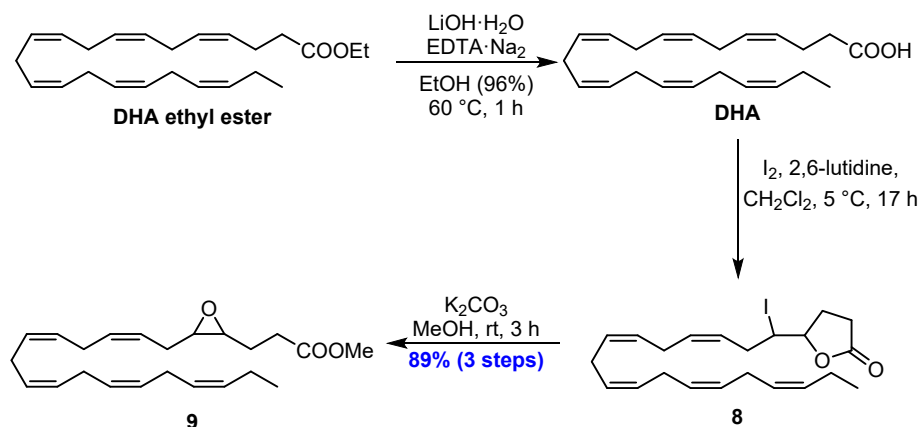

LiOH·H<sub>2</sub>O (4.58 g, 110 mmol, 6.5 eq.) was added to water (45 mL) along with EDTA·Na<sub>2</sub> (31.2 mg), and the resulting mixture was heated to 60 °C under an argon atmosphere. Then, a solution of DHA-ethyl ester (6.03 g, 16.9 mmol, 1.0 eq.) in ethanol (45 mL, 96%) was added and the mixture was stirred under argon at 60 °C for 1 h. The mixture was cooled down and quenched by the addition of 10% HCl (aq., 60 mL) to acidic solution (pH < 3). It was thereafter extracted with ethyl acetate/hexane (2:1, 5 x 15 mL) and the combined organic layers were washed with water (15 mL) and brine (15 mL), and dried over anhydrous MgSO<sub>4</sub>. After filtration the solvent was removed *in vacuo* to give DHA in quantitative yields. The product was used immediately without any further purification. Iodolactone **8** was prepared according to a procedure by Ulven and co-workers, slightly modified by Primdahl *et al.*<sup>1,2</sup> 2,6-Lutidine (3.62 g, 33.8 mmol, 2 eq.) was dissolved in dichloromethane (70 mL) and added dropwise to DHA (5.55 g, 16.9 mmol, 1 eq.). The reaction mixture was cooled down to 0 °C under an argon atmosphere and an ice-cold solution of I<sub>2</sub> (8.68 g, 33.8 mmol, 2 eq.) in dichloromethane (200 mL) added. It was then stirred under argon at 5 °C for 17 h before it was quenched with Na<sub>2</sub>S<sub>2</sub>O<sub>3</sub> (10%, 250 mL). The phases were separated, and the water phase was extracted with dichloromethane (2 x 50 mL), before the combined organic phases were washed with sat. monosodium phosphate (aq., 2 x 50 mL) and then dried with brine (2 x 50 mL) and MgSO<sub>4</sub>. The solvent was removed *in vacuo* and iodolactone **8** was used immediately without any further purification. For the formation of epoxide **9** a procedure by Flock *et al.* was utilised.<sup>3</sup> Iodolactone **8** was dissolved in methanol (100 mL) and added potassium carbonate (7.48 g, 54.1 mmol, 3.2 eq.). The mixture was stirred under argon at room temperature for 3 h and then filtered through celite. Diethyl ether (80 mL) was then used to wash the filter. Water (100 mL) and brine (100 mL) were added to the filtrate, before the mixture was extracted with diethyl ether (5 x 50 mL). The combined organic phases were washed with water (2 x 30 mL) and brine (30 mL) and dried over anhydrous MgSO<sub>4</sub>. After filtration the solvent was removed *in vacuo*. The crude product was purified by flash chromatography (SiO<sub>2</sub>, hexane/ethyl acetate, 5:1) to afford 5.41 g (15.1 mmol, 89%) of **9** as a pale-yellow oil. All spectroscopic data were in agreement with those reported in literature.<sup>4,5</sup> <sup>1</sup>H NMR (400 MHz, CDCl<sub>3</sub>):  $\delta$  5.58 – 5.29 (m, 10H), 3.71 (s, 3H), 3.02 – 2.97 (m, 2H), 2.90 – 2.81 (m, 8H), 2.59 – 2.48 (m, 2H), 2.46 – 2.39 (m, 1H), 2.30 – 2.23 (m, 1H), 2.09 (q, *J* = 7.3 Hz, 2H), 2.00 – 1.91 (m, 1H), 1.87 – 1.78 (m, 1H), 0.99 (t, *J* = 7.5 Hz, 3H); <sup>13</sup>C NMR (101 MHz, CDCl<sub>3</sub>)  $\delta$  173.3, 132.2, 130.8, 128.7, 128.6, 128.5, 128.1, 128.0, 127.8, 127.1, 124.3, 56.7, 56.1, 51.9, 31.1, 26.3, 25.9, 25.8, 25.74, 25.65, 23.5, 20.7, 14.4.

### Synthesis of (3Z,6Z,9Z,12Z,15Z)-1,1-dimethoxyoctadeca-3,6,9,12,15-pentaene (10)

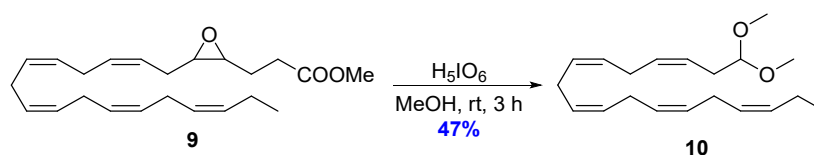

For the synthesis of acetal **10** a procedure by Flock *et al.*<sup>3</sup> was followed. Epoxide **9** (10.4 g, 29.0 mmol, 1.0 eq.) was dissolved in dry methanol (150 mL), before periodic acid (7.96 g, 34.9 mmol, 1.2 eq.) was added. The reaction mixture was stirred at room temperature under an argon atmosphere for 3 h. The reaction was then quenched with water (100 mL) and extracted with heptane (5 x 50 mL). The combined organic phases were washed with water (25 mL) and brine (25 mL) and dried over MgSO<sub>4</sub>. After filtration the solvent was evaporated *in vacuo*. Purification with flash chromatography (SiO<sub>2</sub>, hexane/ethyl acetate, 95:5) afforded the acetal **10** as 4.15 g (13.6 mmol, 47%) of a pale-yellow oil. All spectroscopic data were in agreement with those reported in literature.<sup>6</sup> <sup>1</sup>H NMR (400 MHz, CDCl<sub>3</sub>) δ 5.52 – 5.27 (m, 10H), 4.38 (t, *J* = 5.8 Hz, 1H), 3.33 (s, 6H), 2.88 – 2.79 (m, 8H), 2.42 – 2.39 (m, 2H), 2.11 – 2.03 (m, 2H), 0.97 (t, *J* = 7.5 Hz, 3H). <sup>13</sup>C NMR (101 MHz, CDCl<sub>3</sub>) δ 132.1, 130.4, 128.7, 128.4, 128.2, 128.1, 128.0, 127.1, 124.1, 104.2, 53.0, 31.1, 26.0, 25.8, 25.7, 25.74, 20.66, 14.4.

### Synthesis of (3Z,6Z,9Z,12Z,15Z)-octadeca-3,6,9,12,15-pentaenal (7)

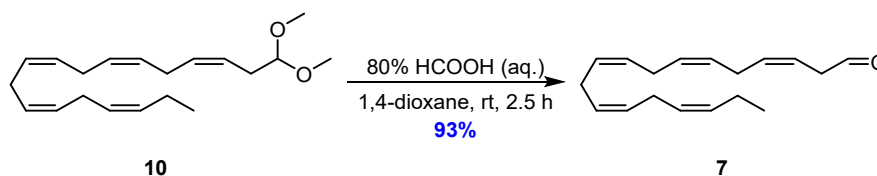

For the synthesis of aldehyde **7** a procedure by Flock *et al.*<sup>3</sup> was followed. Acetal **10** (1.02 g, 3.35 mmol, 1.0 eq.) was dissolved in 1,4-dioxane (9 mL) and a solution of formic acid (11 mL, aq., 80% w:w) added. The reaction was stirred at room temperature for 2.5 h, before water (40 mL) was added. The reaction mixture was extracted with diethyl ether (4 x 10 mL) and the combined organic phases were neutralized with sat. sodium bicarbonate (aq., 2 x 10 mL), washed with brine (10 mL) and dried over MgSO<sub>4</sub>. The solvents were removed under reduced pressure to afford 804 mg (3.11 mmol, 93%) of aldehyde **7** as a yellow oil. The aldehyde was used further without purification to avoid isomerization. All spectroscopic data were in agreement with those reported in literature.<sup>4, 6</sup> <sup>1</sup>H NMR (400 MHz, CDCl<sub>3</sub>) δ 9.68 (t, *J* = 1.9 Hz, 1H), 5.73 – 5.67 (m, 1H), 5.63 – 5.56 (m, 1H), 5.45 – 5.28 (m, 8H), 3.24 – 3.21 (m, 2H), 2.86 – 2.80 (m, 8H), 2.08 (p, *J* = 7.4 Hz, 2H), 0.98 (t, *J* = 7.5 Hz, 3H). <sup>13</sup>C NMR (101 MHz, CDCl<sub>3</sub>) δ 199.5, 133.3, 132.2, 129.0, 128.8, 128.6, 127.9, 127.9, 127.2, 127.1, 118.8, 42.6, 26.1, 25.8, 25.8, 25.7, 20.7, 14.4.

### Synthesis of (4Z,7Z,10Z,13Z,16Z)-nonadeca-4,7,10,13,16-pentaen-1-yne (**6**)

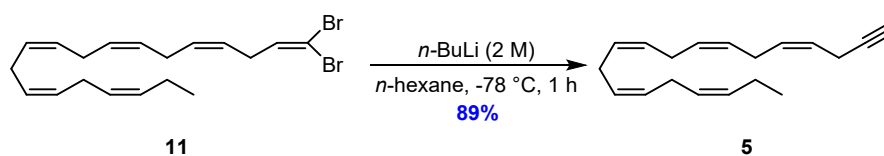

Following a procedure described by Flock et al.<sup>7</sup> dibromide **11** (143 mg, 0.345 mmol, 1.0 eq.) was dissolved in dry hexane and cooled to -78 °C. A solution of *n*-butyllithium in cyclohexane (2 M, 0.8 mL, 2.3 eq.) was added dropwise. The reaction was stirred at -78 °C for 1 h and then quenched by the addition of sat. ammonium chloride (aq., 1.5 mL). The reaction mixture was warmed to room temperature and extracted with diethyl ether (4 x 2 mL). After washing with brine (2 mL) and drying over MgSO<sub>4</sub>, the solvent was evaporated. The resulting crude oil was purified by flash chromatography (SiO<sub>2</sub>, petroleum ether) producing 78 mg of alkyne **5** as a light-yellow oil (0.307 mmol, 89%). All spectroscopic data were in agreement with those reported in literature.<sup>7</sup> <sup>1</sup>H NMR (400 MHz, CDCl<sub>3</sub>) δ 5.52 – 5.28 (m, 10H), 2.99 – 2.96 (m, 2H), 2.89 – 2.78 (m, 8H), 2.12 – 2.04 (m, 2H), 1.98 (t, *J* = 2.7 Hz, 1H), 0.98 (t, *J* = 7.5 Hz, 3H); <sup>13</sup>C NMR (101 MHz, CDCl<sub>3</sub>) δ 132.2, 130.2, 128.8, 128.7, 128.5, 128.1, 128.0, 127.5, 127.1, 124.2, 82.7, 68.3, 25.8 (2C), 25.7 (2C), 20.7, 17.0, 14.4.

### Synthesis of (2'S)-1-O-(Oxiran-2-ylmethyl)-2,3-O-isopropylidene-*sn*-glycerol ((2R,2'S)-**4**)

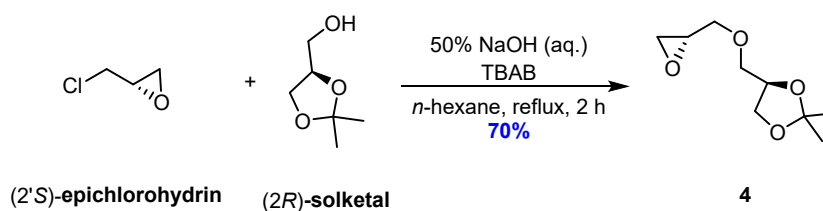

(2R)-Solketal (0.47 mL, 0.500 g, 3.78 mmol, 1 eq.) was dissolved in hexane (1.75 mL) before TBAB (121.2 mg, 0.376 mmol, 0.1 eq.) and sodium hydroxide solution (50% aq., 602.4 mg, 7.53 mmol, 2 eq.) was added. (2'S)-Epichlorohydrin (0.61 mL, 0.720 g, 7.80 mmol, 2.1 eq.) was dissolved in hexane (3.5 mL) and added dropwise to the reaction mixture. The reaction was then stirred at reflux for 2 h. After cooling to room temperature, the reaction was diluted with water (10 mL) and ethyl acetate (10 mL). The phases were separated, and the aqueous phase was extracted with ethyl acetate (3 x 10 mL). After washing with brine (10 mL) and drying over MgSO<sub>4</sub> the solvent was removed *in vacuo*. The resulting oil was purified by flash chromatography (SiO<sub>2</sub>, petroleum ether:ethyl acetate, 3: 1) to yield the desired (2R,2'S)-**4** product as a slightly yellow oil in 70% yield (501.3 mg, 2.66 mmol). The <sup>1</sup>H-NMR spectra indicated the presence of its (2R,2'R)-**4** diastereomer (6-7%). The spectroscopic data were in agreement with that previously reported.<sup>8</sup> <sup>1</sup>H NMR (400 MHz, CDCl<sub>3</sub>) δ 4.30 – 4.24 (m, 1H), 4.04 (dd, *J* = 8.3, 6.5 Hz, 1H), 3.79 (dd, *J* = 11.7, 2.9 Hz, 1H), 3.73 (dd, *J* = 8.3, 6.4 Hz, 1H), 3.62 (dd, *J* = 10.0, 5.8 Hz, 1H), 3.50 (dd, *J* = 10.0, 5.2 Hz, 1H), 3.44 (dd, *J* = 11.7, 5.9 Hz, 1H), 3.16 – 3.12 (m, 1H), 2.78 (dd, *J* = 5.0, 4.1 Hz, 1H), 2.59 (dd, *J* = 5.0, 2.7 Hz, 1H), 1.41 (s, 3H), 1.35 (s, 3H). <sup>13</sup>C NMR (101 MHz, CDCl<sub>3</sub>) δ 109.6, 74.8, 72.5, 72.3, 66.7, 50.9, 44.2, 26.9, 25.5.

### Hydrolytic Kinetic Resolution by the (*S,S*)-Co-Jacobsen Catalyst ((*2R,2'S*)-**4**)

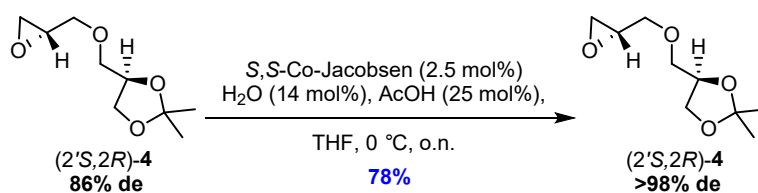

The (*S,S*)-Co-Jacobsen catalyst (38.0 mg, 0.0629 mmol, 2.5 mol%) was dissolved in dry toluene (3 mL) before acetic acid (37.0  $\mu$ L, 38.6 mg, 0.643 mmol, 25 mol%) was added via syringe. The bright red solution was stirred for 2 h exposed to air, before the solvent was evaporated under reduced pressure. The resulting brown sludge was kept in vacuum for 30 minutes. The atmosphere was then exchanged for argon, dry THF (2 mL) was added, and the mixture cooled to 0 °C. (*2R,2'S*)-**4** (484 mg, 2.57 mmol, 1 eq., 86% de) dissolved in dry THF (1 mL) was added followed by water (6.5 mg, 0.359 mmol, 14 mol%). The reaction was stirred overnight, slowly reaching room temperature. The solvent was evaporated, and the resulting crude product purified by flash chromatography (SiO<sub>2</sub>, heptane:ethyl acetate, 1:1). This gave 379 mg (2.02 mmol, 78% yield, >98% de) of (*2R,2'S*)-**4** as a light brown oil. All spectroscopic data were in accordance with that previously published.<sup>8</sup>  $[\alpha]_D^{25} = -18.8$  ( $c = 1.38$ , methanol). [Lit.<sup>8</sup>  $[\alpha]_D^{20} = -24.3$  ( $c = 1.00$ , ethanol)]; <sup>1</sup>H NMR (400 MHz, CDCl<sub>3</sub>)  $\delta$  4.30–4.24 (m, 1H), 4.05 (dd,  $J = 8.3, 6.4$  Hz, 1H), 3.80 (dd,  $J = 11.7, 2.9$  Hz, 1H), 3.73 (dd,  $J = 8.3, 6.4$  Hz, 1H), 3.62 (dd,  $J = 10.0, 5.8$  Hz, 1H), 3.50 (dd,  $J = 10.0, 5.2$  Hz, 1H), 3.44 (dd,  $J = 11.7, 5.9$  Hz, 1H), 3.17–3.13 (m, 1H), 2.79 (dd,  $J = 5.0, 4.1$  Hz, 1H), 2.60 (dd,  $J = 5.0, 2.7$  Hz, 1H), 1.42 (s, 3H), 1.35 (s, 3H). <sup>13</sup>C NMR (101 MHz, CDCl<sub>3</sub>)  $\delta$  109.6, 74.8, 72.5, 72.3, 66.8, 50.9, 44.3, 26.9, 25.5.

### Synthesis of ((*2'R*)-1-*O*-[(*4'Z,7'Z,10'Z,13'Z,16'Z,19'Z*)-2'-Methoxydocosa-4',7',10',13',16',19'-hexaenyl]-*sn*-glycerol ((*2R,2'R*)-**3**))

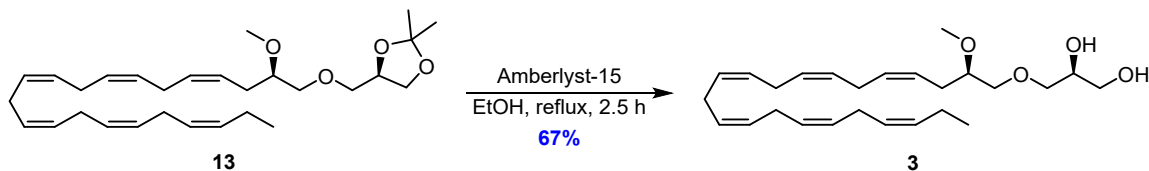

The methoxylated acetonide **13** (10 mg, 0.021 mmol, 1.0 eq.) was dissolved in ethanol (96%, 2 mL) under a nitrogen atmosphere, and wet, acidic Amberlyst-15 (6 mg, 60 wt.%) was added. The solution was refluxed for 2.5 h, cooled to room temperature and filtered to remove the catalyst. After concentration *in vacuo* purification with flash chromatography (hexane/ethyl acetate, 1:1 to 0:1) gave the desired product as a pale-yellow oil (6 mg, 67%). All spectroscopic data were in accordance with that previously published.<sup>9</sup>  $[\alpha]_D^{23} = -3.98$  ( $c = 0.460$ , ethanol) [Lit.<sup>9</sup>  $[\alpha]_D^{20} = -3.68$  ( $c = 0.125$ , ethanol)]. <sup>1</sup>H NMR (400 MHz, CDCl<sub>3</sub>)  $\delta$  5.51–5.28 (m, 12H), 3.89–3.84 (m, 1H), 3.70 (dd,  $J = 11.4, 3.9$  Hz, 1H), 3.65–3.52 (m, 4H), 3.48 (dd,  $J = 10.5, 6.0$  Hz, 1H), 3.42 (s, 4H), 2.95 (s, 1H), 2.88–2.68 (m, 10H), 2.38–2.17 (m, 3H), 2.11–2.04 (m, 2H), 0.97 (t,  $J = 7.5$  Hz, 3H). <sup>13</sup>C NMR (101 MHz, CDCl<sub>3</sub>)  $\delta$  132.2, 130.5, 128.7, 128.5, 128.5, 128.4, 128.2, 128.2, 128.0, 128.0, 127.1, 125.1, 80.2, 73.6, 73.3, 70.7, 64.2, 57.5, 28.7, 25.9, 25.8, 25.8, 25.8, 25.7, 20.7, 14.4. HRMS (ESI)  $m/z$ : [M+Na]<sup>+</sup> Calcd for C<sub>26</sub>H<sub>42</sub>O<sub>4</sub>Na 441.2975; Found 441.2974.

**NMR and HRMS spectra:  
Compound 11**

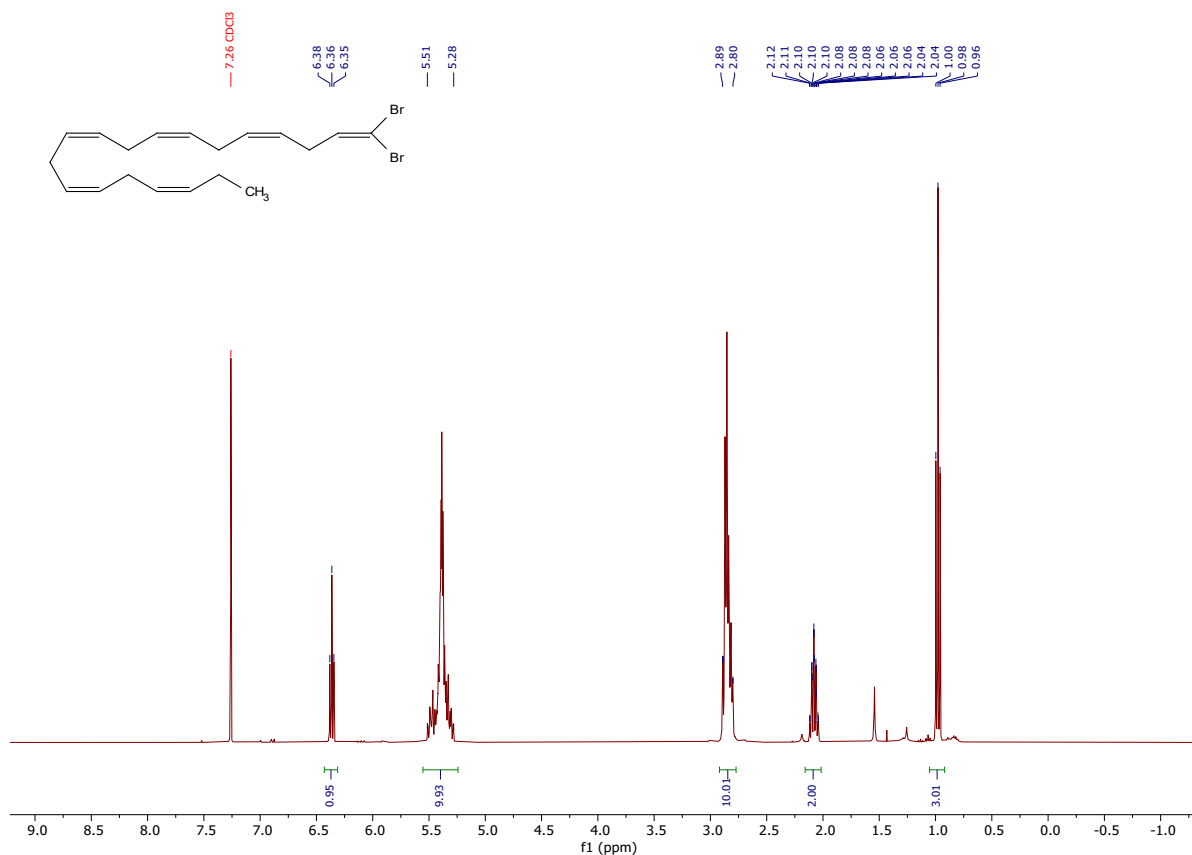

**Figure 1**  $^1\text{H NMR}$  (400 MHz,  $\text{CDCl}_3$ ) of compound **11**.

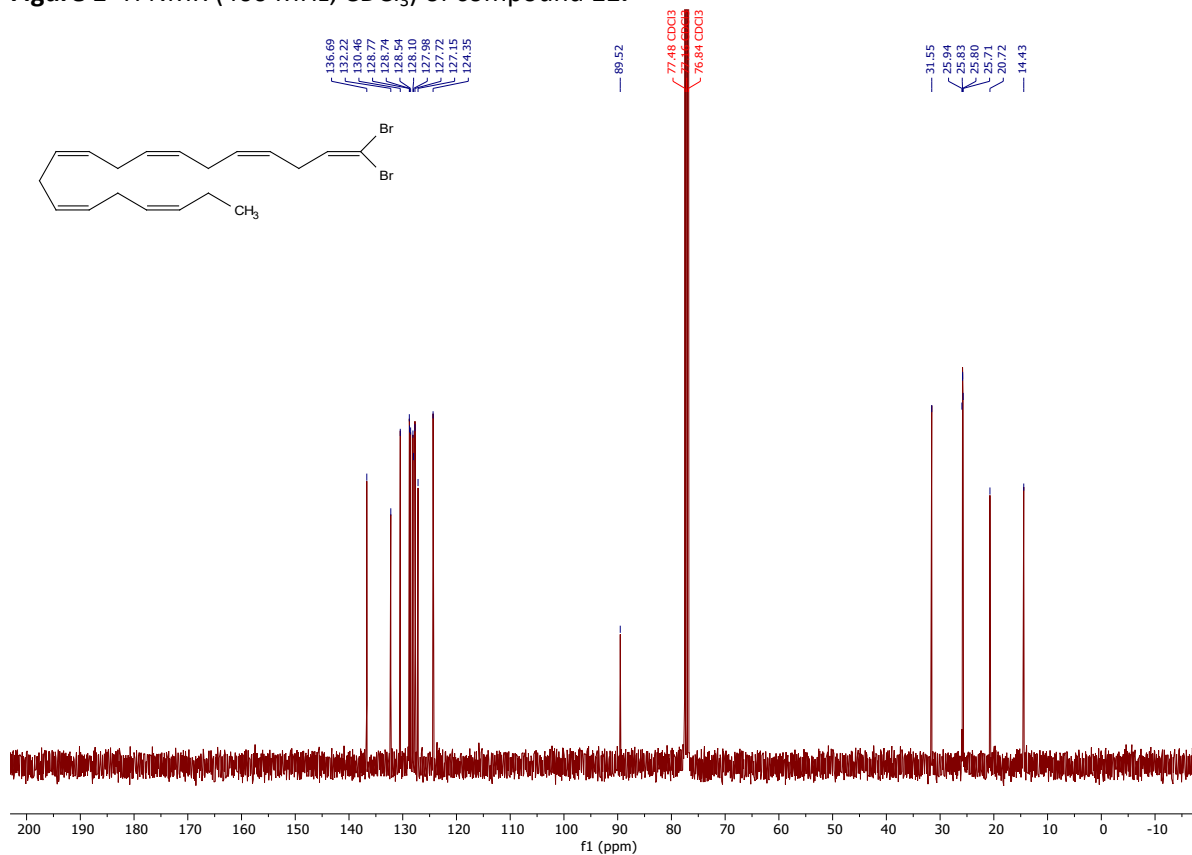

**Figure 2**  $^{13}\text{C NMR}$  (101 MHz,  $\text{CDCl}_3$ ) of compound **11**.

## Compound 6:

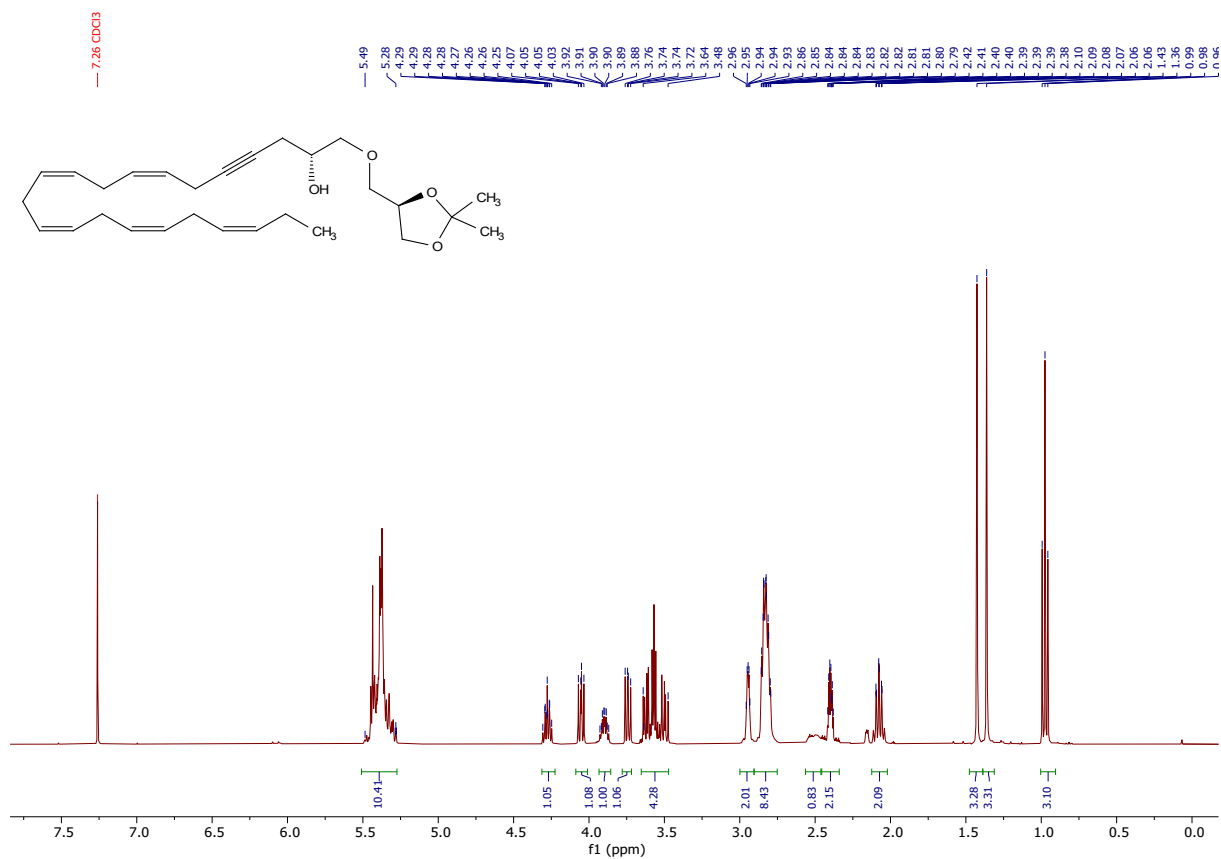

Figure 3 <sup>1</sup>H NMR (400 MHz, CDCl<sub>3</sub>) of compound 6.

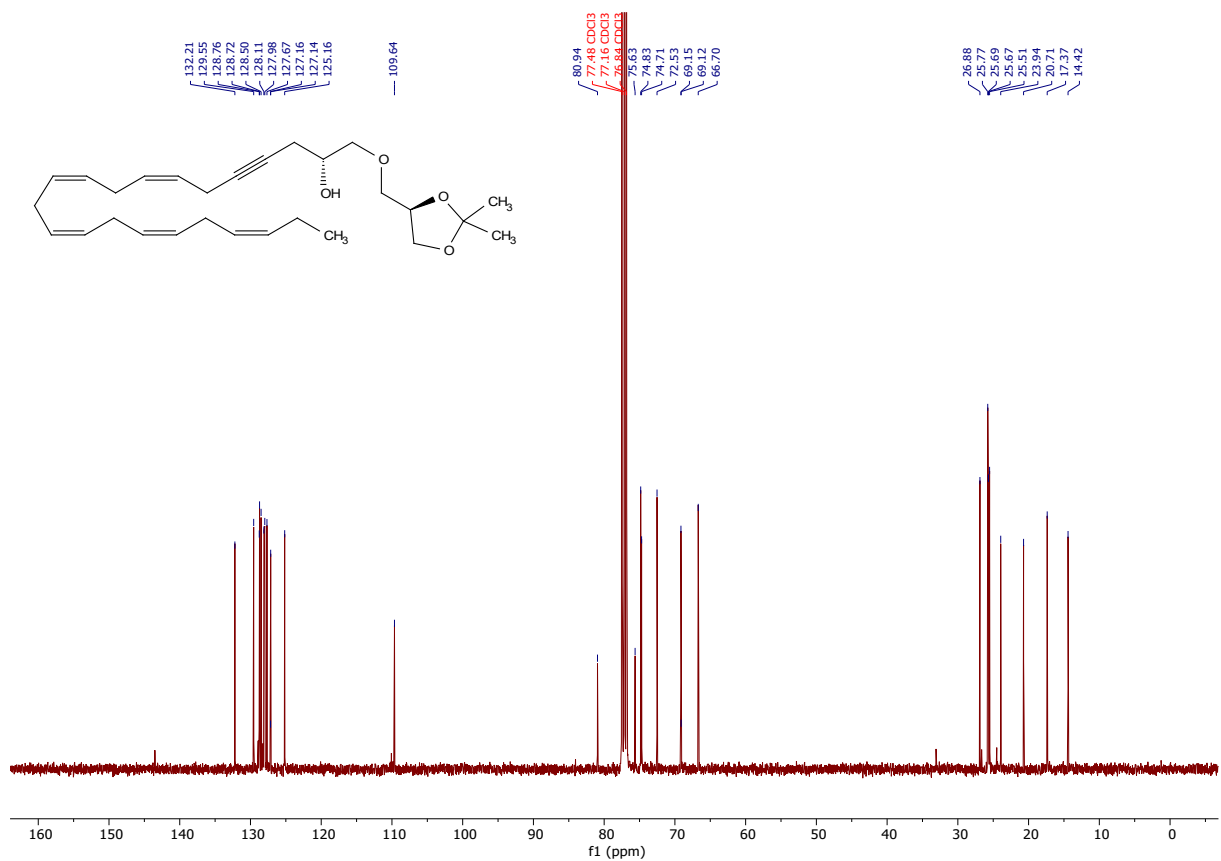

Figure 4 <sup>13</sup>C NMR (101 MHz, CDCl<sub>3</sub>) of compound 6.

**Compound 12:**

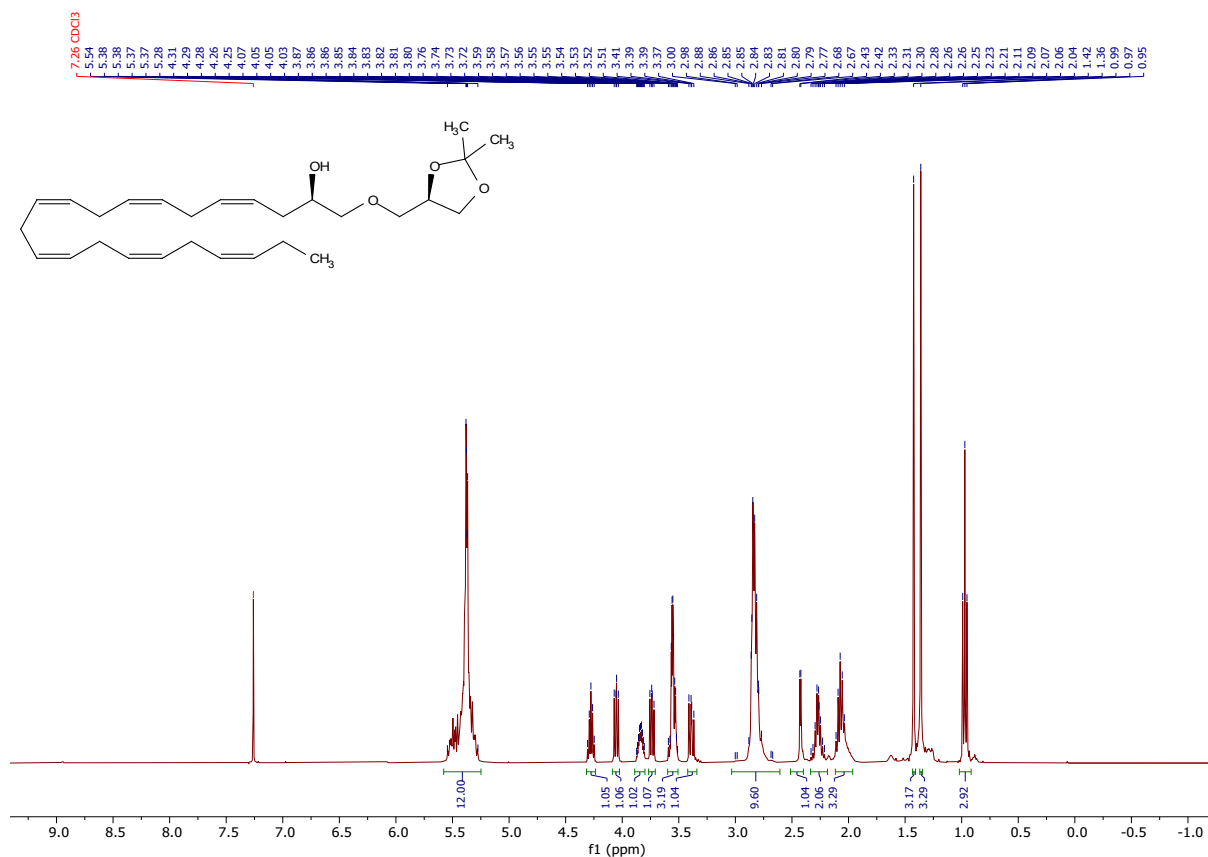

**Figure 5**  $^1\text{H}$  NMR (400 MHz,  $\text{CDCl}_3$ ) of compound **12**.

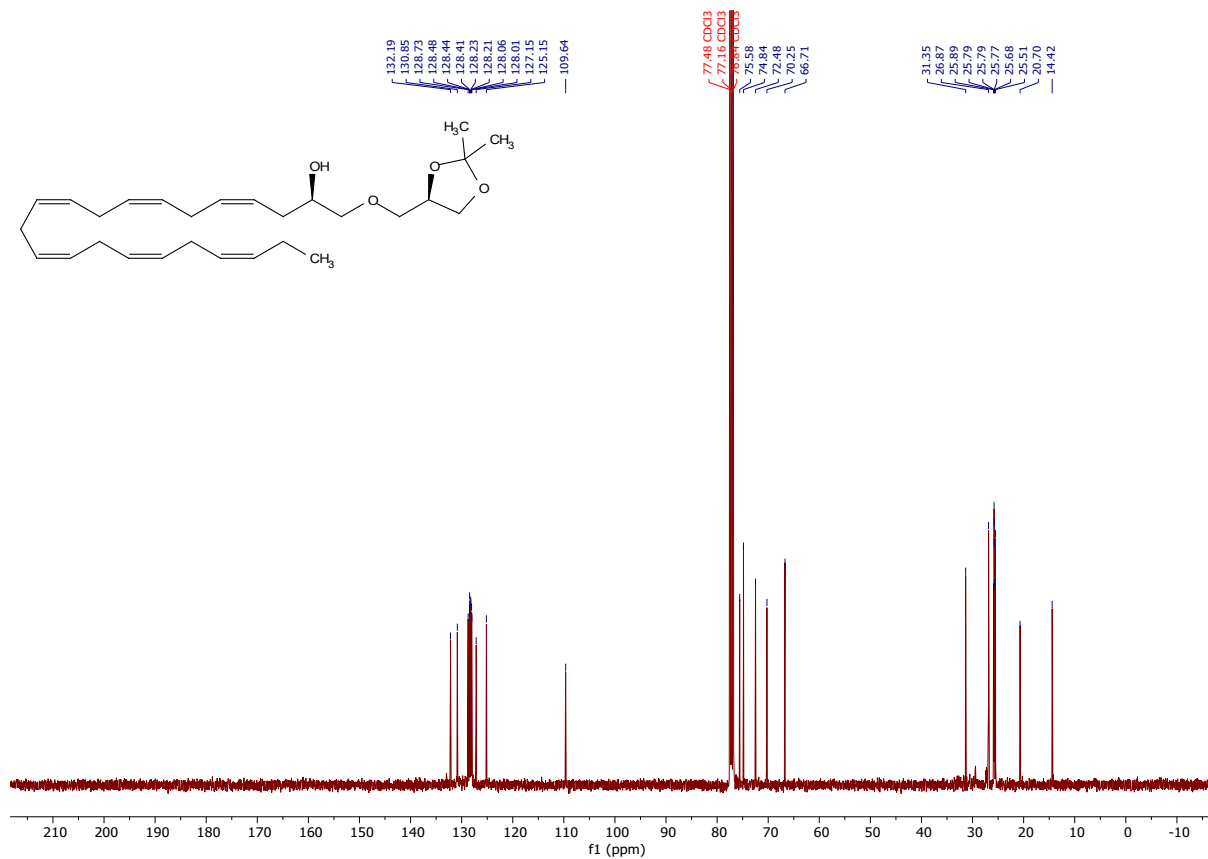

**Figure 6**  $^{13}\text{C}$  NMR (101 MHz,  $\text{CDCl}_3$ ) of compound **12**.



### Compound 3

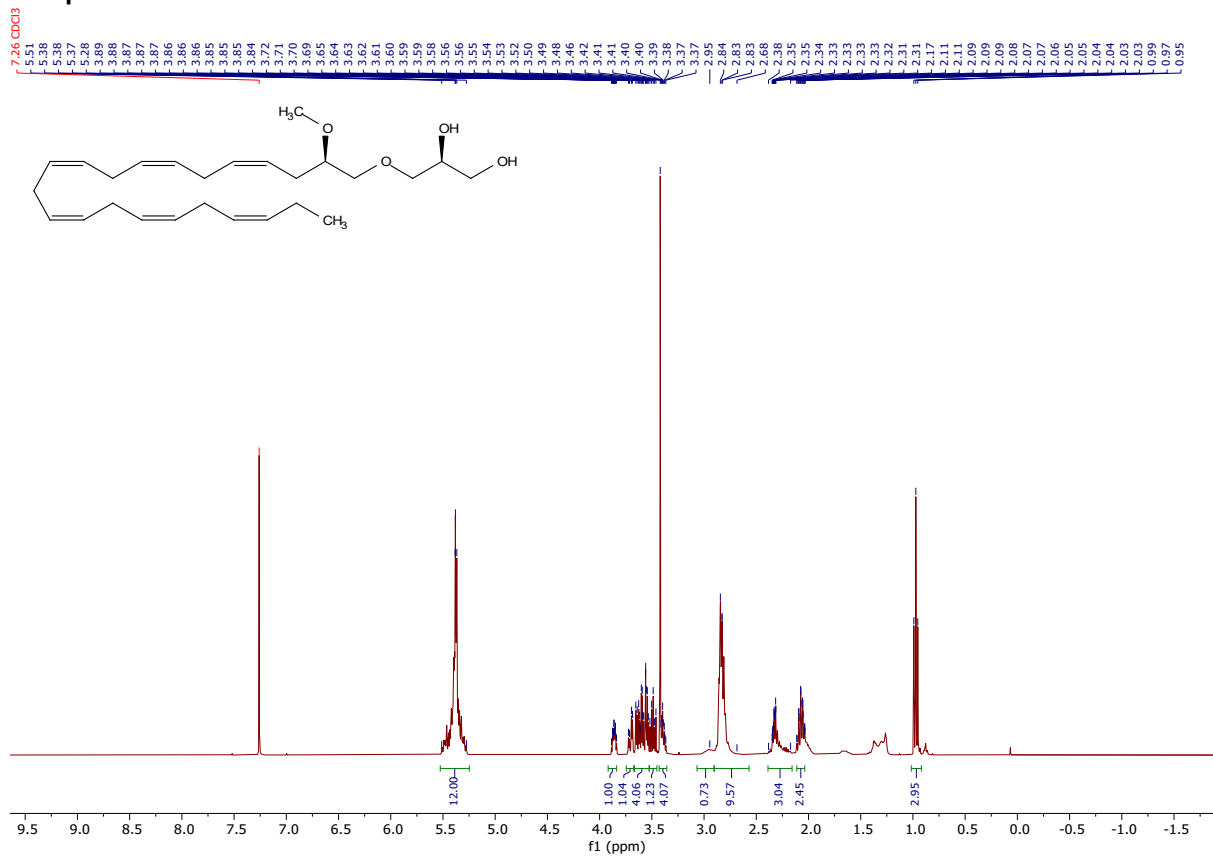

Figure 9 <sup>1</sup>H NMR (400 MHz, CDCl<sub>3</sub>) of compound 3.

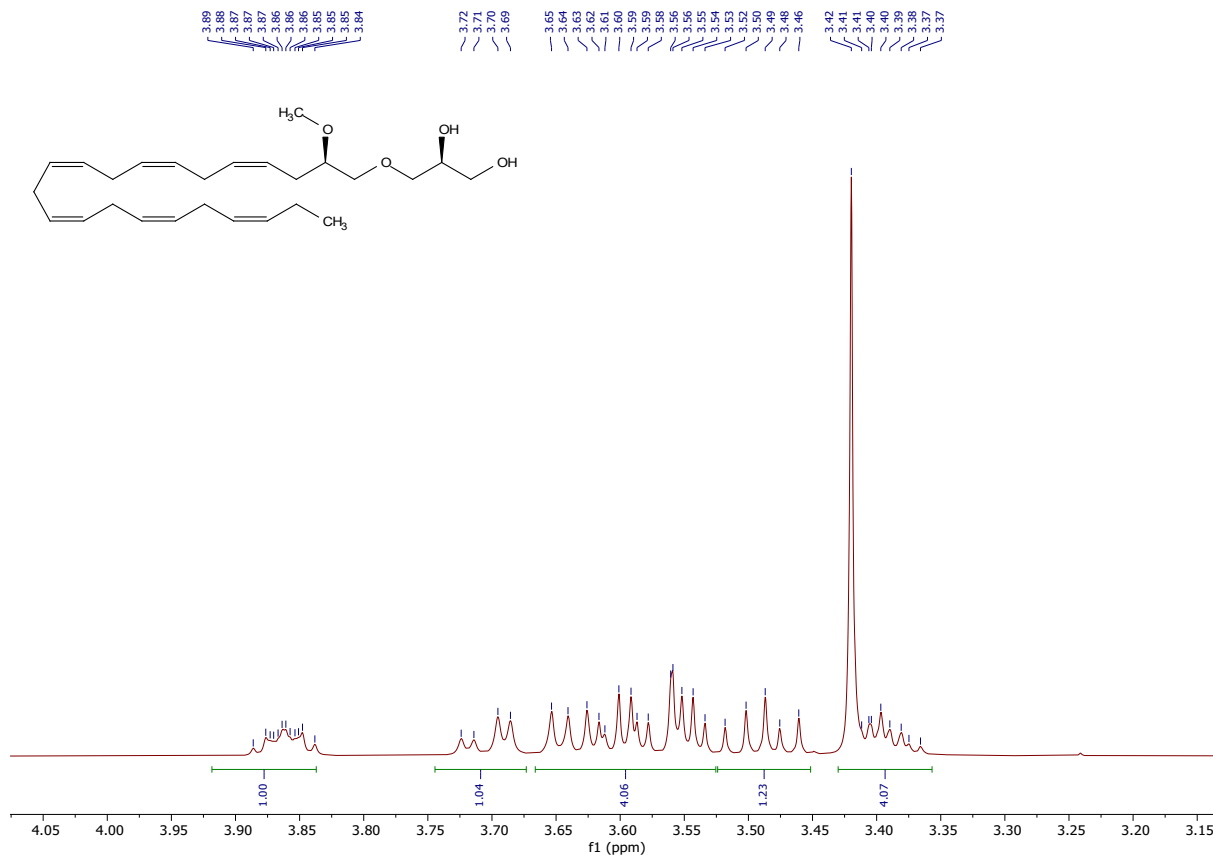

Figure 10 Close-up of <sup>1</sup>H NMR (400 MHz, CDCl<sub>3</sub>) of compound 3.

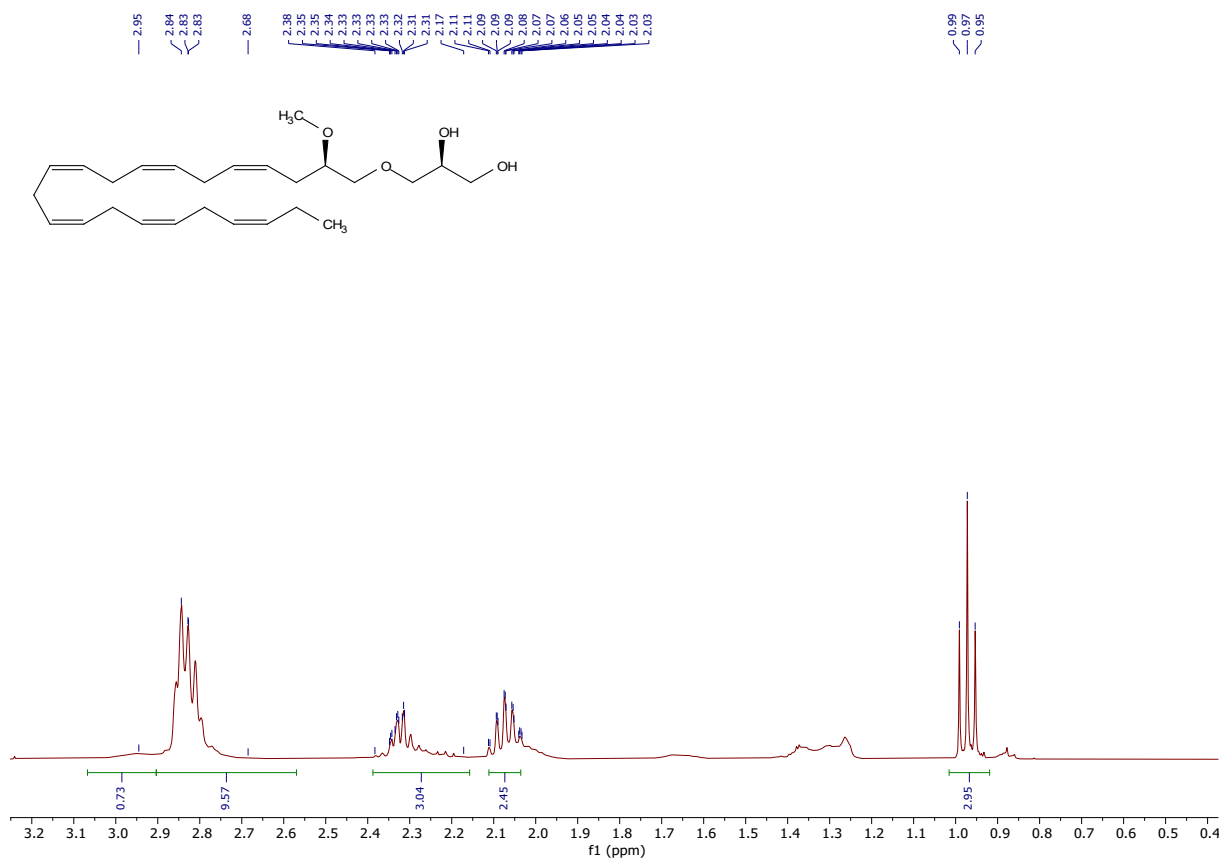

Figure 11 Close-up of <sup>1</sup>H NMR (400 MHz, CDCl<sub>3</sub>) of compound 3

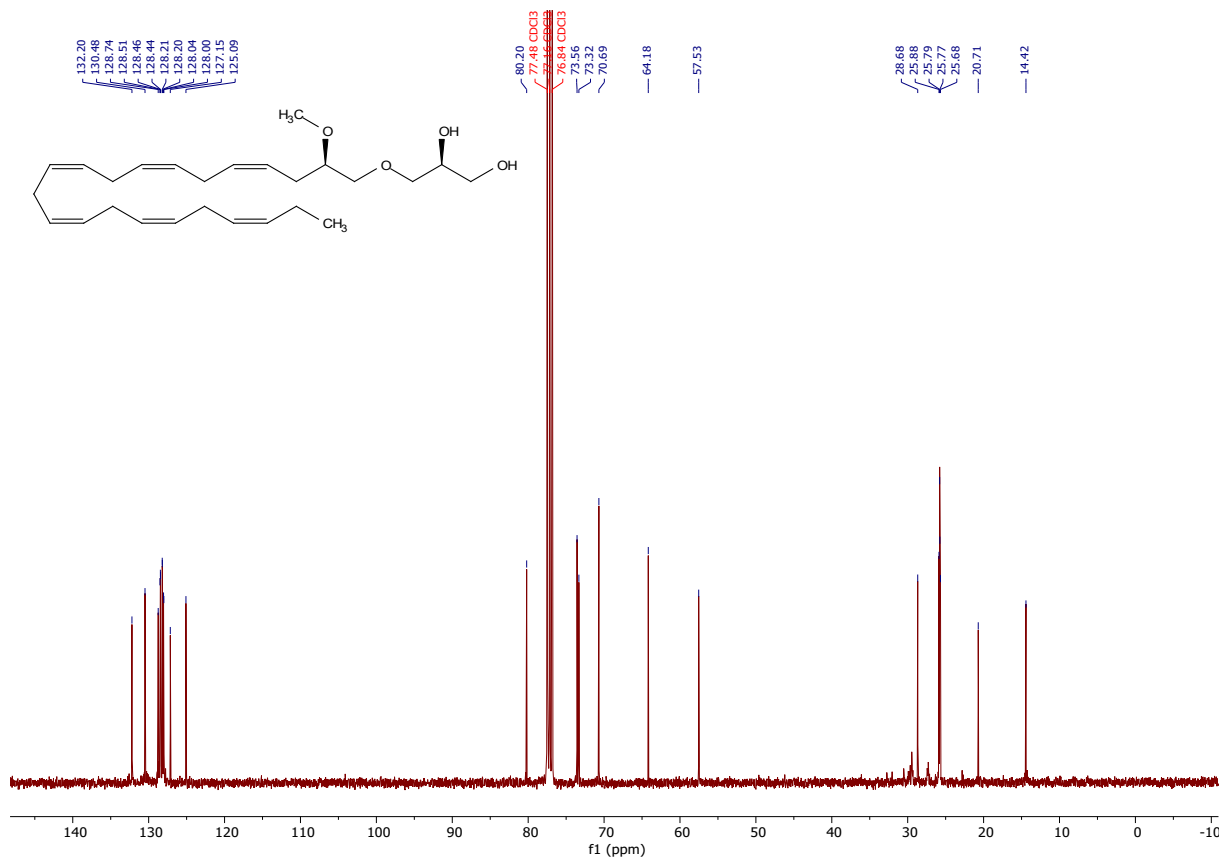

Figure 12 <sup>13</sup>C NMR (101 MHz, CDCl<sub>3</sub>) of compound 3

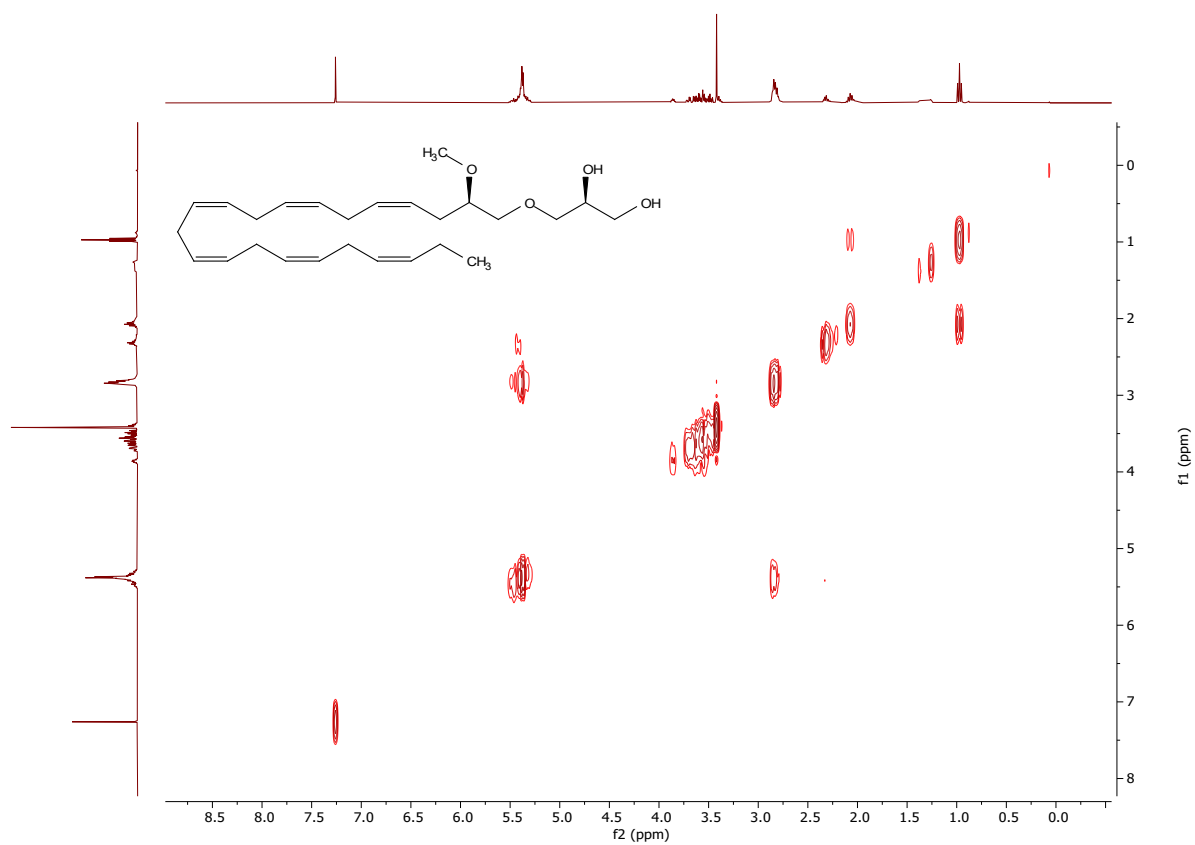

Figure 13 COSY (400 MHz, CDCl<sub>3</sub>) of compound 3

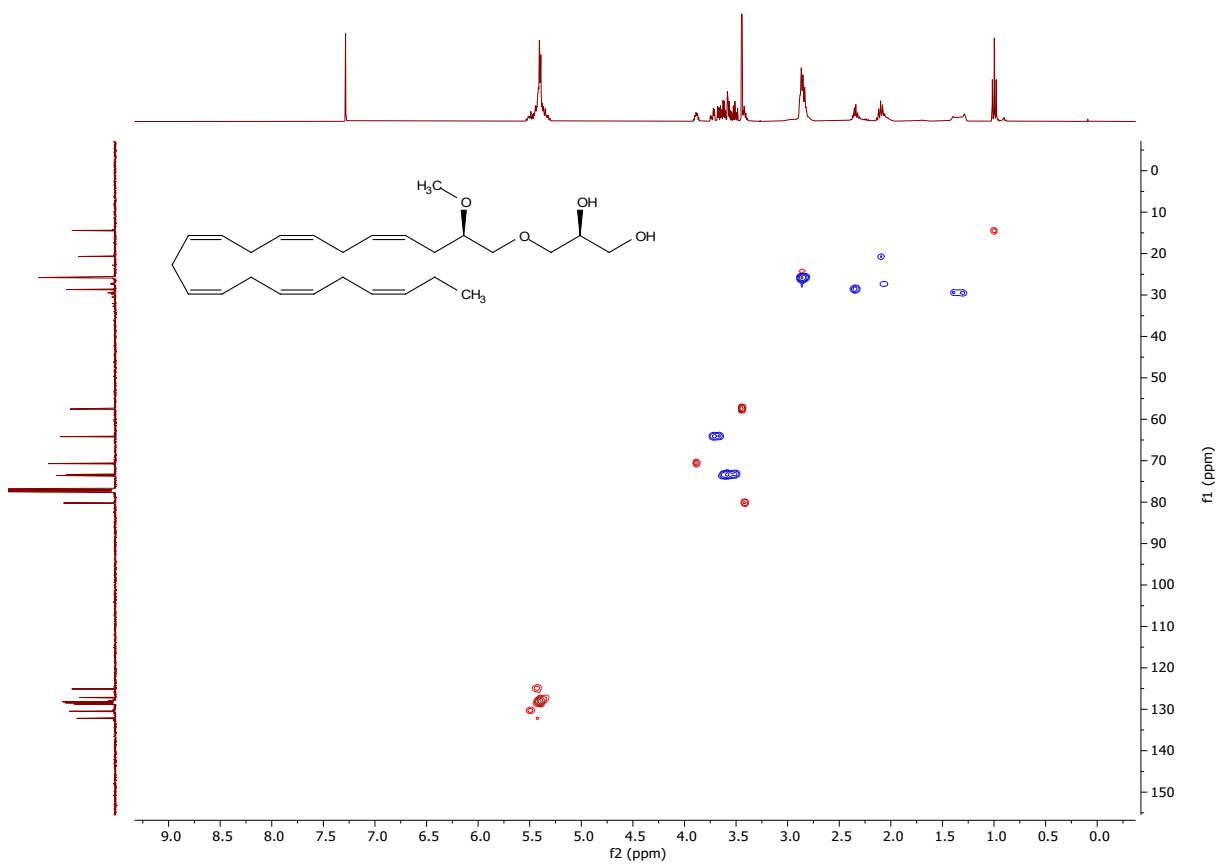

Figure 14 HSQC (400 MHz, CDCl<sub>3</sub>) of compound 3

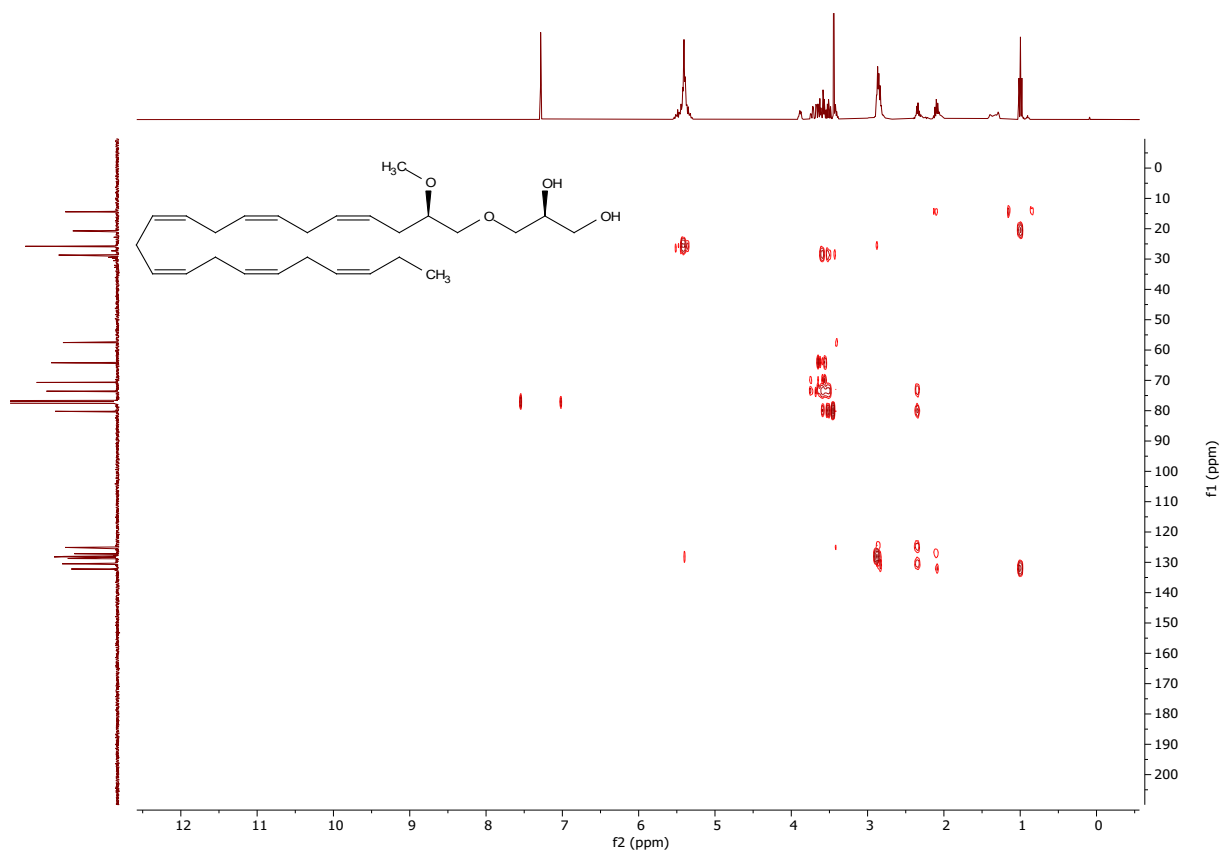

Figure 15 HMBC (400 MHz, CDCl<sub>3</sub>) of compound 3

## Mass Spectrum List Report

**Analysis Info**

Analysis Name D:\Data\maxis2025\21006.d  
 Method ESI\_pos\_50\_1500\_os.m  
 Sample Name MB-3-017-A  
 Comment

Acquisition Date 03-Jun-25 11:19:03 AM

Operator Erlend  
 Instrument maXis II ETD 1823391.22318

**Acquisition Parameter**

|             |            |                      |        |                  |           |
|-------------|------------|----------------------|--------|------------------|-----------|
| Source Type | ESI        | Set Capillary        | 3500 V | Set Nebulizer    | 0.5 Bar   |
| Focus       | Not active | Set End Plate Offset | -500 V | Set Dry Heater   | 200 °C    |
| Scan Begin  | 50 m/z     | Set Charging Voltage | 2000 V | Set Dry Gas      | 4.0 l/min |
| Scan End    | 1500 m/z   | Set Corona           | 0 nA   | Set Divert Valve | Source    |
|             |            |                      |        | Set APCI Heater  | 0 °C      |

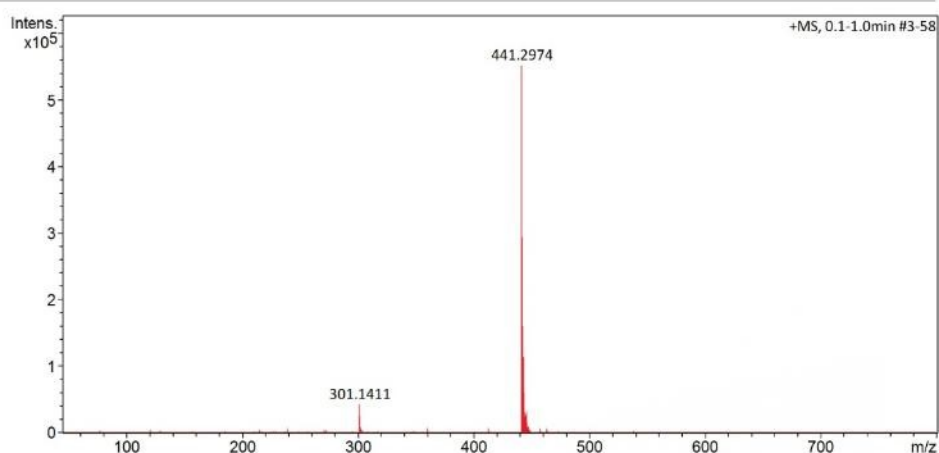

| #  | m/z      | Res.  | S/N     | I      | I %   | FWHM   |
|----|----------|-------|---------|--------|-------|--------|
| 1  | 120.9871 | 29888 | 929.2   | 4213   | 0.8   | 0.0040 |
| 2  | 129.0522 | 28539 | 520.8   | 2356   | 0.4   | 0.0045 |
| 3  | 157.0834 | 30209 | 553.3   | 2471   | 0.4   | 0.0052 |
| 4  | 185.1148 | 33250 | 580.3   | 2576   | 0.5   | 0.0056 |
| 5  | 215.1254 | 35545 | 646.1   | 2952   | 0.5   | 0.0061 |
| 6  | 217.1047 | 33126 | 541.8   | 2483   | 0.4   | 0.0066 |
| 7  | 227.1253 | 35895 | 505.4   | 2356   | 0.4   | 0.0063 |
| 8  | 229.1408 | 32073 | 570.3   | 2682   | 0.5   | 0.0071 |
| 9  | 239.0890 | 33576 | 490.6   | 2359   | 0.4   | 0.0071 |
| 10 | 239.1617 | 37166 | 1049.5  | 5046   | 0.9   | 0.0064 |
| 11 | 249.1826 | 37181 | 497.9   | 2439   | 0.4   | 0.0067 |
| 12 | 257.1360 | 36944 | 552.5   | 2815   | 0.5   | 0.0070 |
| 13 | 271.1879 | 36979 | 537.4   | 2954   | 0.5   | 0.0073 |
| 14 | 273.1673 | 37094 | 603.3   | 3344   | 0.6   | 0.0074 |
| 15 | 301.1411 | 35769 | 6666.9  | 43037  | 7.8   | 0.0084 |
| 16 | 302.1444 | 39272 | 1242.6  | 8113   | 1.5   | 0.0077 |
| 17 | 304.2610 | 39618 | 636.6   | 4244   | 0.8   | 0.0077 |
| 18 | 360.3238 | 40212 | 493.9   | 4737   | 0.9   | 0.0090 |
| 19 | 413.2663 | 39489 | 381.8   | 4502   | 0.8   | 0.0105 |
| 20 | 441.2974 | 38725 | 42748.5 | 552855 | 100.0 | 0.0114 |
| 21 | 442.3008 | 40180 | 12400.5 | 160683 | 29.1  | 0.0110 |
| 22 | 443.3122 | 34468 | 8761.7  | 113685 | 20.6  | 0.0129 |
| 23 | 444.3163 | 40131 | 2432.6  | 31587  | 5.7   | 0.0111 |
| 24 | 445.3281 | 36453 | 2111.4  | 27443  | 5.0   | 0.0122 |
| 25 | 446.3321 | 36880 | 566.7   | 7370   | 1.3   | 0.0121 |
| 26 | 447.3441 | 37799 | 731.9   | 9532   | 1.7   | 0.0118 |
| 27 | 448.3478 | 42231 | 215.2   | 2806   | 0.5   | 0.0106 |
| 28 | 449.3598 | 37106 | 225.4   | 2947   | 0.5   | 0.0121 |
| 29 | 457.2715 | 41888 | 382.3   | 5071   | 0.9   | 0.0109 |
| 30 | 463.2795 | 38868 | 396.8   | 5330   | 1.0   | 0.0119 |

21006.d

Bruker Compass DataAnalysis 4.3

printed: 03-Jun-25 11:21:59 AM

by: Erlend

Page 1 of 1

Figure 16 MS spectra of compound 3

# Elemental Analysis Report

## Analysis Info

Sample Name MB-3-017-A  
Method ESI\_pos\_50\_1500\_os.m

Acquisition Date 03-Jun-25 11:19:03 AM  
Analysis Name D:\Data\maxis2025\21006.d

## Acquisition Parameter

|             |            |                      |        |                  |           |
|-------------|------------|----------------------|--------|------------------|-----------|
| Source Type | ESI        | Set Capillary        | 3500 V | Set Nebulizer    | 0.5 Bar   |
| Focus       | Not active | Set End Plate Offset | -500 V | Set Dry Heater   | 200 °C    |
| Scan Begin  | 50 m/z     | Set Charging Voltage | 2000 V | Set Dry Gas      | 4.0 l/min |
| Scan End    | 1500 m/z   | Set Corona           | 0 nA   | Set Divert Valve | Source    |
|             |            |                      |        | Set APCI Heater  | 0 °C      |

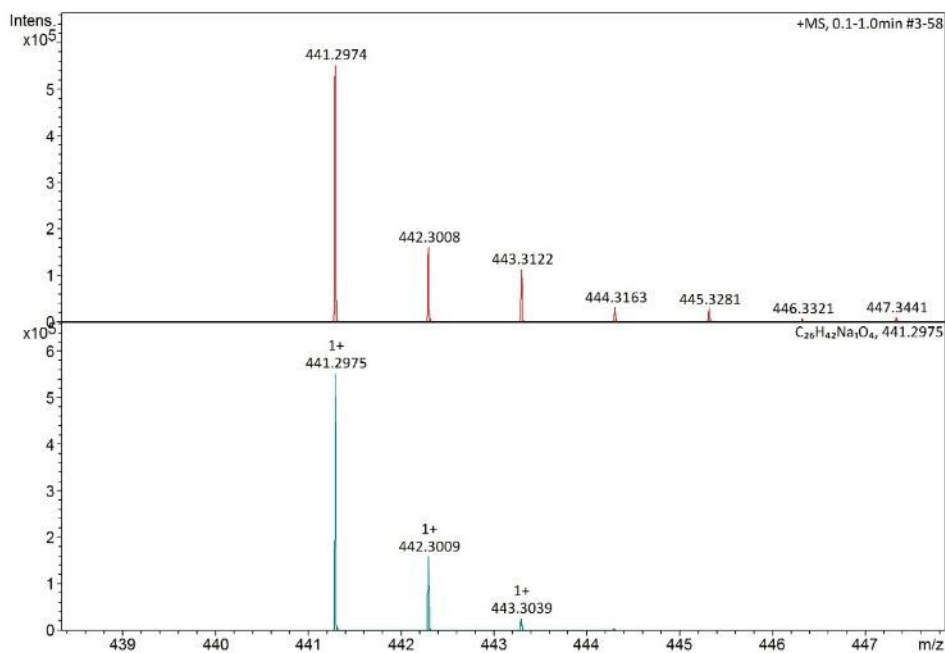

| Meas. m/z | Ion Formula                                                    | m/z      | err [ppm] |
|-----------|----------------------------------------------------------------|----------|-----------|
| 441.2974  | C <sub>26</sub> H <sub>42</sub> Na <sub>4</sub> O <sub>4</sub> | 441.2975 | 0.4       |

Figure 17 HRMS spectra of compound 3

## **Methods for molecular dynamic simulations**

### **Protein-ligand complex prediction**

The FASTA sequence of soybean 15-LOX-1 was retrieved from UniProt (ID: P08170). The sequence was submitted to Boltz-2<sup>10</sup> cofolding and affinity prediction on the Rowan server (Rowan Scientific. <https://www.rowansci.com> (accessed 2025-10-20), using linoleic acid, one water molecule and Fe<sup>3+</sup> as binding partners. The resulting protein-ligand complex was further modelled in Maestro (Schrödinger Release 2025-1). The protein structure was prepared using the Protein Preparation Workflow<sup>11</sup> at pH 7.4 with default parameters. Ligands were prepared using the LigPrep module (**Schrödinger Release 2025-1**; LigPrep, Schrödinger, LLC, New York, NY, 2025). For carboxylic acid-containing ligands, only the carboxylate ionization state was retained for further modelling.

### **Molecular dynamics simulations and MM/GBSA scoring**

The Orientation of Proteins in Membranes server<sup>12</sup> (PPM 2.0) was used to position the protein–ligand complex relative to the lipid bilayer. The docked complex of linoleic acid was prepared for molecular dynamics (MD) simulations using Desmond (Schrödinger Release 2025-1).<sup>13</sup> The system was embedded in a POPC bilayer, solvated with the TIP3P water model, and neutralized with NaCl. Additional KCl was added to a final concentration of 0.15 M. All components were parameterized using the OPLS4 force field.<sup>14</sup> Following the standard Desmond relaxation protocol, all-atom MD simulations were performed in the NPT ensemble at 310 K using the Nosé–Hoover chain thermostat and at 1 atm pressure using the Martyna–Tobias–Klein barostat. Production runs of 200–400 ns were carried out, with trajectory frames saved every 100 ps.

Trajectory snapshots (extracted every 1 ns; 200 per system) from the 200 ns production runs of the linoleic acid and DHA–MEL complexes were evaluated with Prime MM-GBSA (**Schrödinger Release 2025-1**; Schrödinger, LLC, New York, NY, 2025) to estimate binding free energies.

### **Induced Fit Docking and MM/GBSA rescoring**

A representative frame from the 400 ns MD simulation of the linoleic acid complex was extracted using k-means clustering of the simulation trajectory. All water molecules, lipids, sodium, and potassium ions were removed. Induced Fit Docking (IFD)<sup>15-17</sup> with extended sampling was then used to generate optimized binding poses for all four ligands. The resulting poses were rescored using Prime MM/GBSA to assess binding affinities.

## Induced-Fit–refined complexes with 15-LOX-1

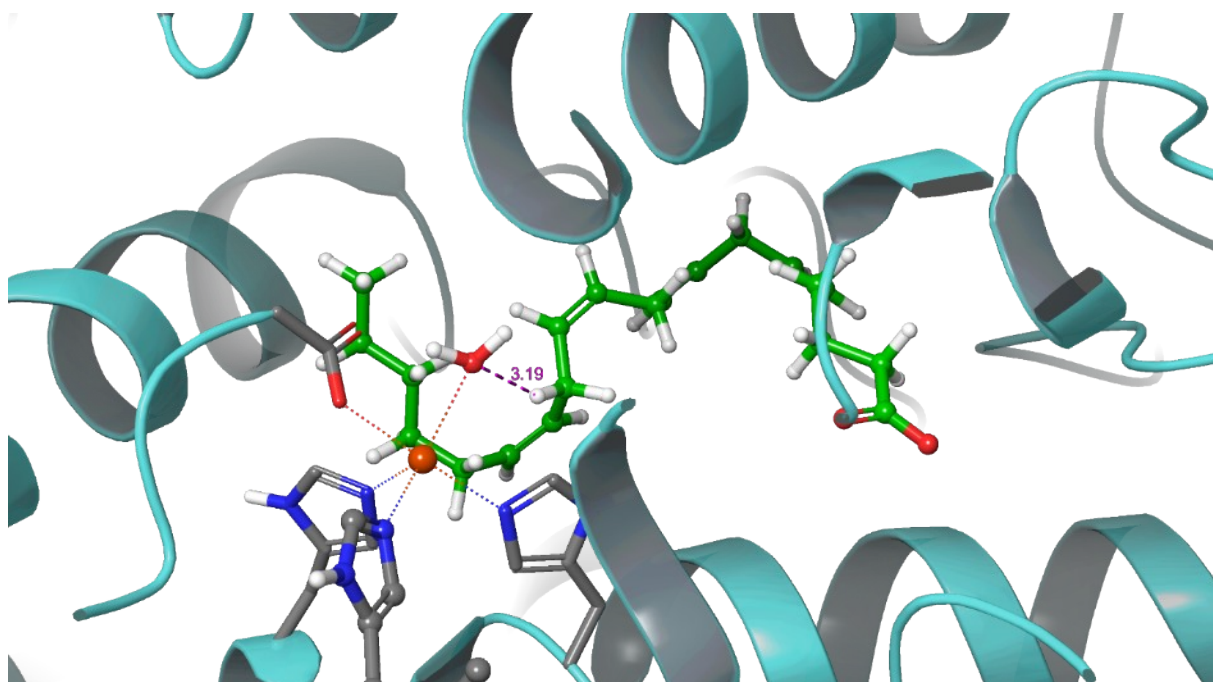

**Figure 18** Arachidonic acid (green) positioned in the active site of the soybean 15-LOX-1 model. The catalytic  $\text{Fe}^{3+}$  is coordinated by three histidines, one isoleucine, and a water molecule. The distance between the coordinating water molecule and the bis-allylic hydrogen of arachidonic acid is indicated by the dotted purple line.

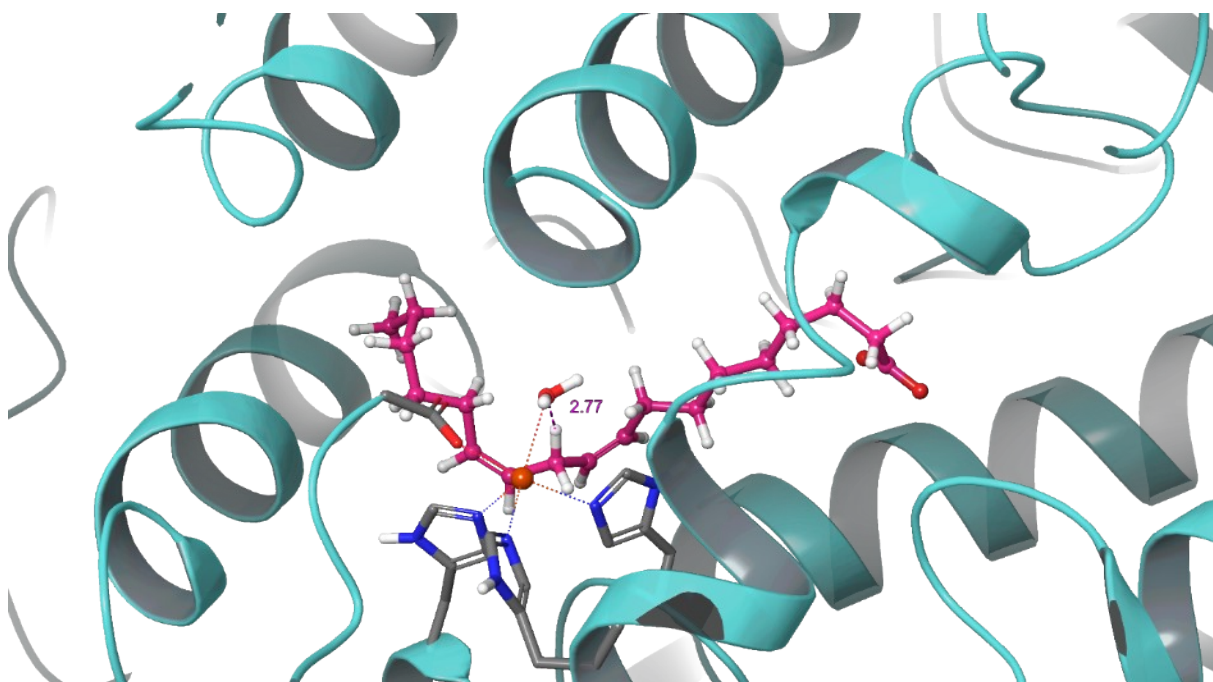

**Figure 19** Linoleic acid (pink) positioned in the active site of the soybean 15-LOX-1 model. The catalytic  $\text{Fe}^{3+}$  is coordinated by three histidines, one isoleucine, and a water molecule. The distance between the coordinating water molecule and the bis-allylic hydrogen of linoleic acid is indicated by the dotted purple line.

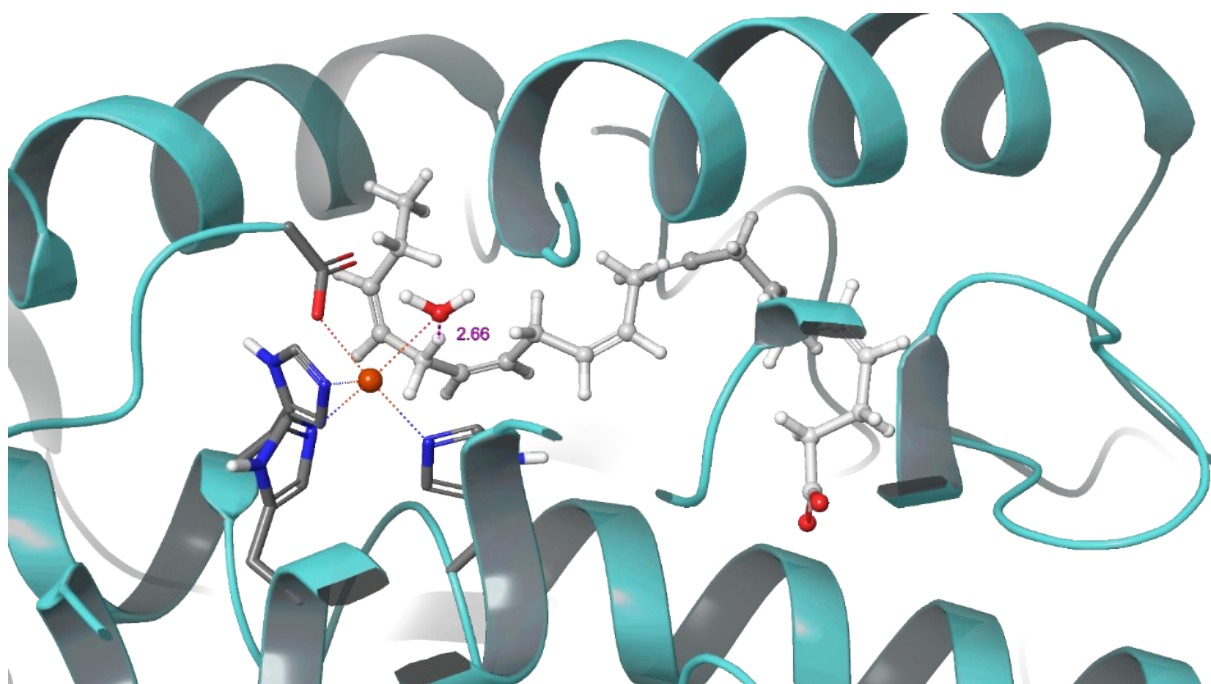

**Figure 20** DHA (white) positioned in the active site of the soybean 15-LOX-1 model. The catalytic Fe<sup>3+</sup> is coordinated by three histidines, one isoleucine, and a water molecule. The distance between the coordinating water molecule and the bis-allylic hydrogen of DHA is indicated by the dotted purple line.

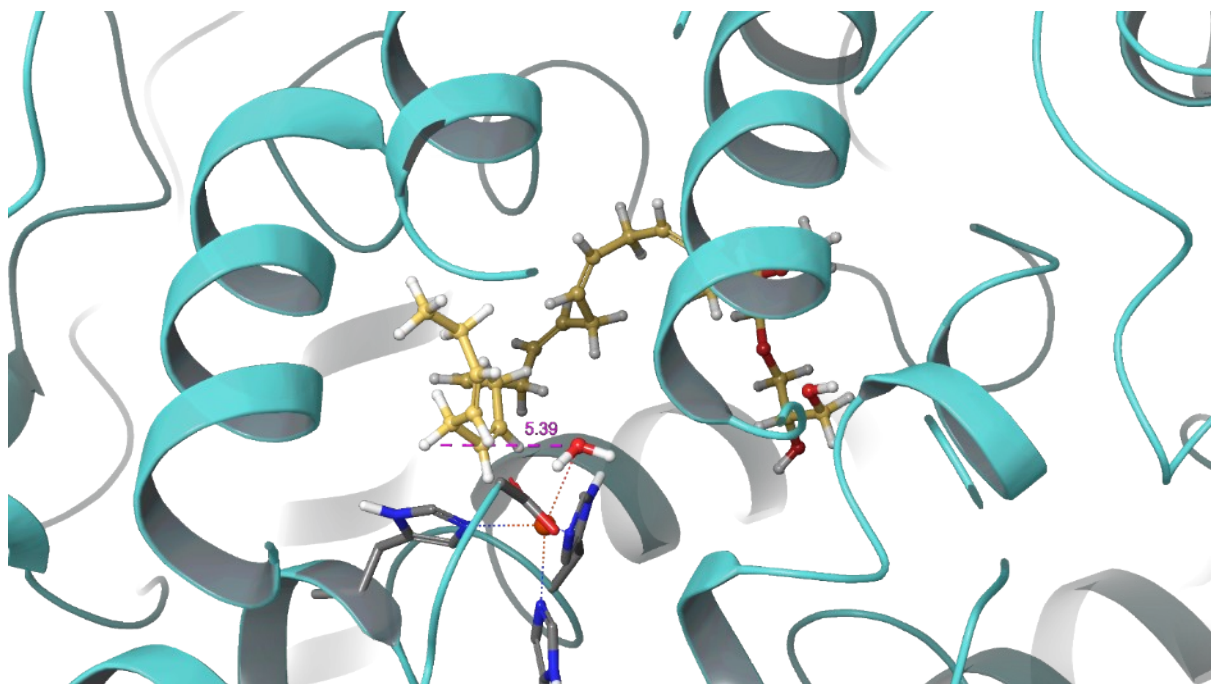

**Figure 21** DHA-like MEL 3 (yellow) positioned in the active site of the soybean 15-LOX-1 model. The catalytic Fe<sup>3+</sup> is coordinated by three histidines, one isoleucine, and a water molecule. The distance between the coordinating water molecule and the bis-allylic hydrogen of DHA-like MEL 3 is indicated by the dotted purple line.

## Docking poses with coordinating amino acids:

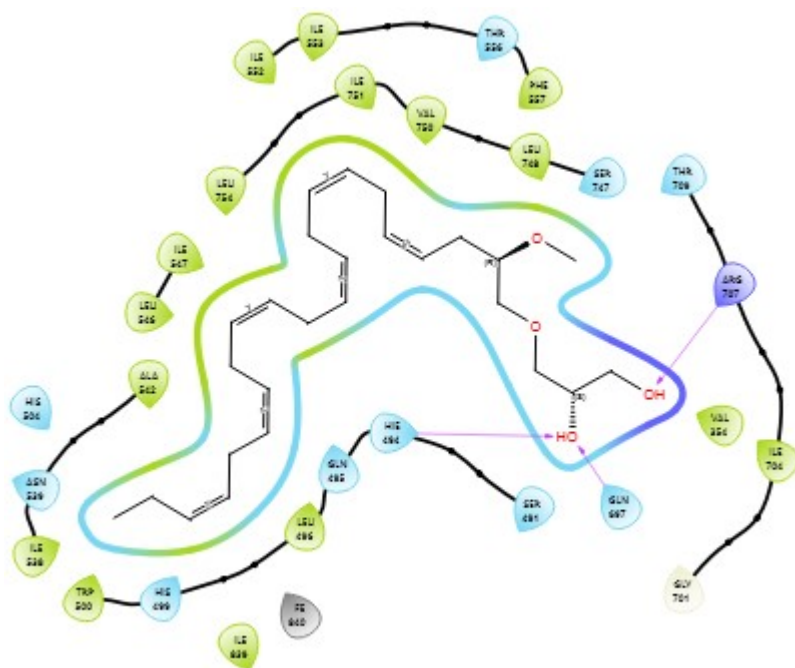

**Figure 22** 2D interaction diagram of DHA-like MEL 3 in the 15-LOX-1 model. The hydrophobic residues are shown in green around the hydrocarbon chain, while polar residues appear in blue and the charged arginine in purple near the headgroup. Pink lines indicate hydrogen bonds with nearby polar and charged residues, and the catalytic iron is shown in gray.

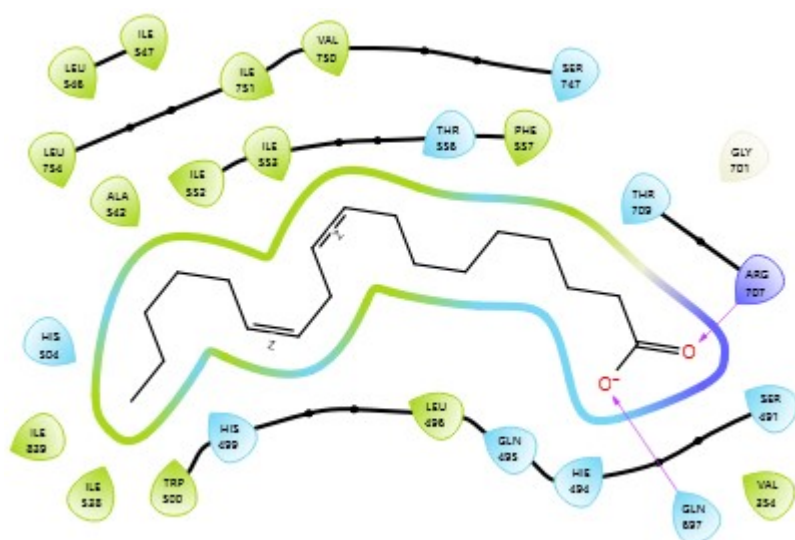

**Figure 23** 2D interaction diagram of linoleic acid in the 15-LOX-1 model. The hydrophobic residues are shown in green around the hydrocarbon chain, while polar residues appear in blue and the charged arginine in purple near the headgroup. Pink lines indicate hydrogen bonds and electrostatic interactions with nearby polar and charged residues.

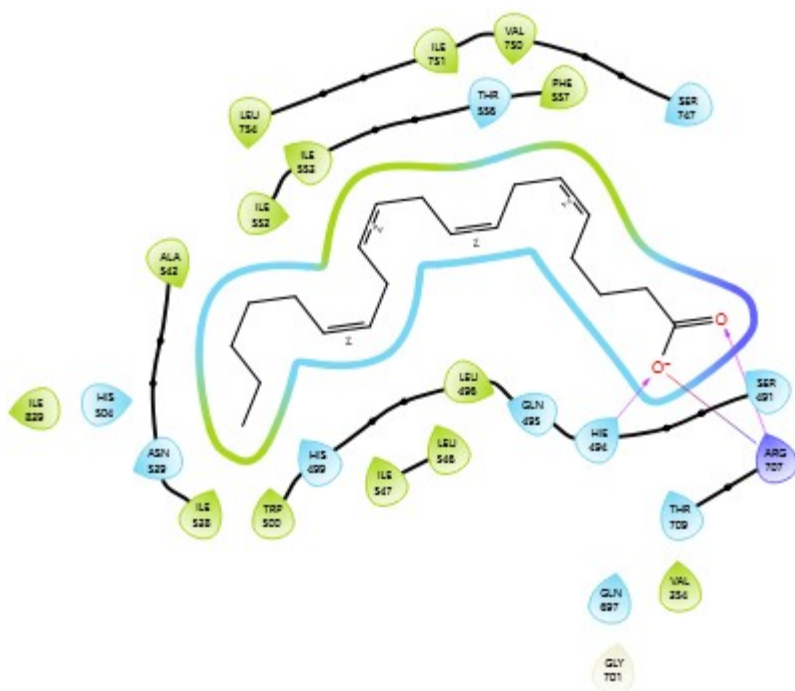

**Figure 24** 2D interaction diagram of arachidonic acid in the 15-LOX-1 model. The hydrophobic residues are shown in green around the hydrocarbon chain, while polar residues appear in blue and the charged arginine in purple near the headgroup. Pink lines indicate hydrogen bonds and electrostatic interactions with nearby polar and charged residues

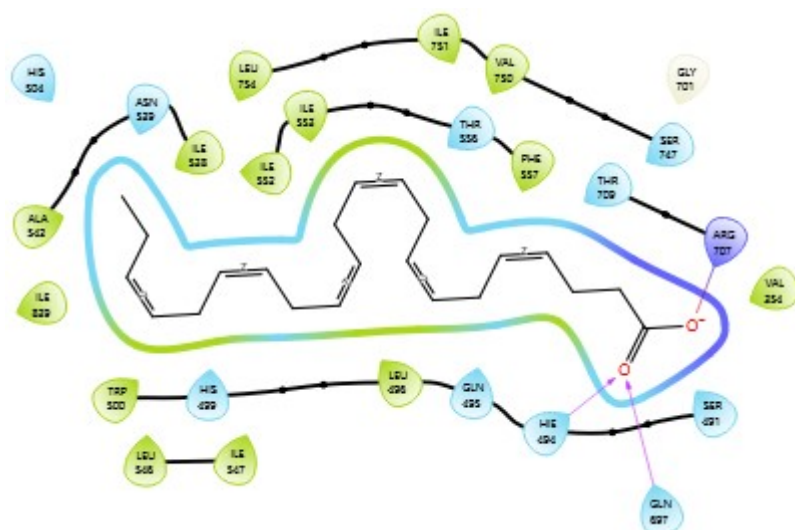

**Figure 25** 2D interaction diagram of docosahexaenoic acid in the 15-LOX-1 model. The hydrophobic residues are shown in green around the hydrocarbon chain, while polar residues appear in blue and the charged arginine in purple near the headgroup. Pink lines indicate hydrogen bonds and electrostatic interactions with nearby polar and charged residues

### Incubation studies with DHA-like MEL 3

In six parallels, DHA-like MEL 3 (168 µg), was incubated with soybean 15-LOX-1 (borate buffer, pH 9.0, 10 000 U/mL) for 45 minutes. The reactions were then combined and quenched by addition of sodium borohydride in methanol (0.1 M, 20 mL) at 0 °C. Excess sodium borohydride was neutralised by dropwise addition of acetic acid. The aqueous phase was then extracted with diethyl ether (4 x 10 mL), dried over MgSO<sub>4</sub> and concentrated *in vacuo*. The resulting product mixture was dissolved in methanol and subjected to UV-Vis and MS analyses. The major peak in the MS spectra (*m/z* 441.2973) corresponds to the Na-adduct of DHA-like MEL 3. The peak at *m/z* 457.2923 corresponds to the Na-adduct of C<sub>26</sub>H<sub>42</sub>O<sub>5</sub>, which could indicate the introduction of a hydroxyl group on DHA-like MEL 3. The product mixture was also analysed by MS/MS of the peak at *m/z* 457.2923 and HPLC-MS. UV (MeOH) λ<sub>max</sub> 228 nm; HRMS (ESI) *m/z*: [M+Na]<sup>+</sup> Calcd for C<sub>26</sub>H<sub>42</sub>O<sub>5</sub>Na 457.2924, Found 457.2923.

Overlaid Spectra:

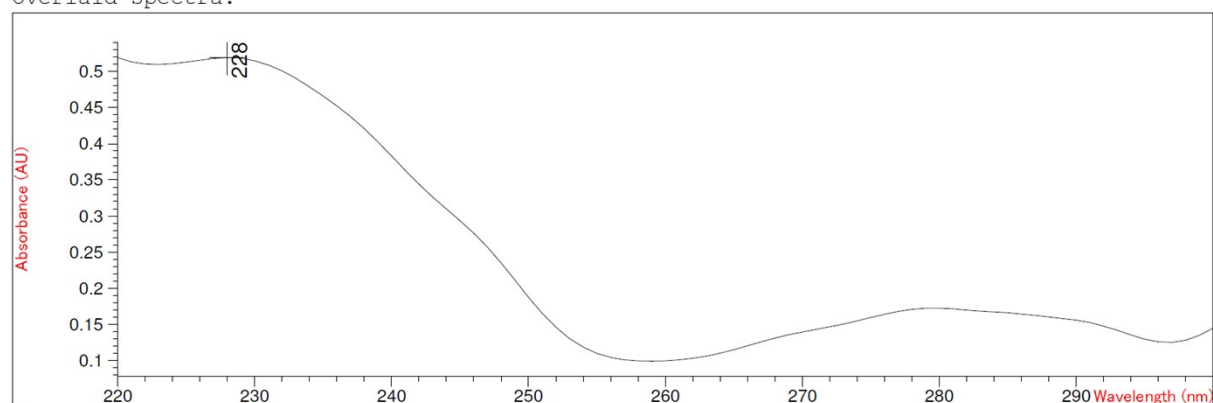

| # | Name | Peaks (nm) | Abs (AU) |
|---|------|------------|----------|
| 1 |      | 228.0      | 0.51915  |

**Figure 26** UV-Vis chromatogram of the resulting product mixture after incubation of DHA-like MEL 3 with 15-LOX-1.

# Mass Spectrum List Report

**Analysis Info**

Analysis Name D:\Data\maxis2025\21276.d  
 Method ESI\_pos\_50\_1500\_os.m  
 Sample Name MB-3-055-A  
 Comment

Acquisition Date 17-Nov-25 9:02:29 AM

Operator n/a  
 Instrument maXis II ETD 1823391.22318

**Acquisition Parameter**

|             |            |                      |        |                  |           |
|-------------|------------|----------------------|--------|------------------|-----------|
| Source Type | ESI        | Set Capillary        | 3500 V | Set Nebulizer    | 0.5 Bar   |
| Focus       | Not active | Set End Plate Offset | -500 V | Set Dry Heater   | 200 °C    |
| Scan Begin  | 50 m/z     | Set Charging Voltage | 2000 V | Set Dry Gas      | 4.0 l/min |
| Scan End    | 1500 m/z   | Set Corona           | 0 nA   | Set Divert Valve | Source    |
|             |            |                      |        | Set APCI Heater  | 0 °C      |

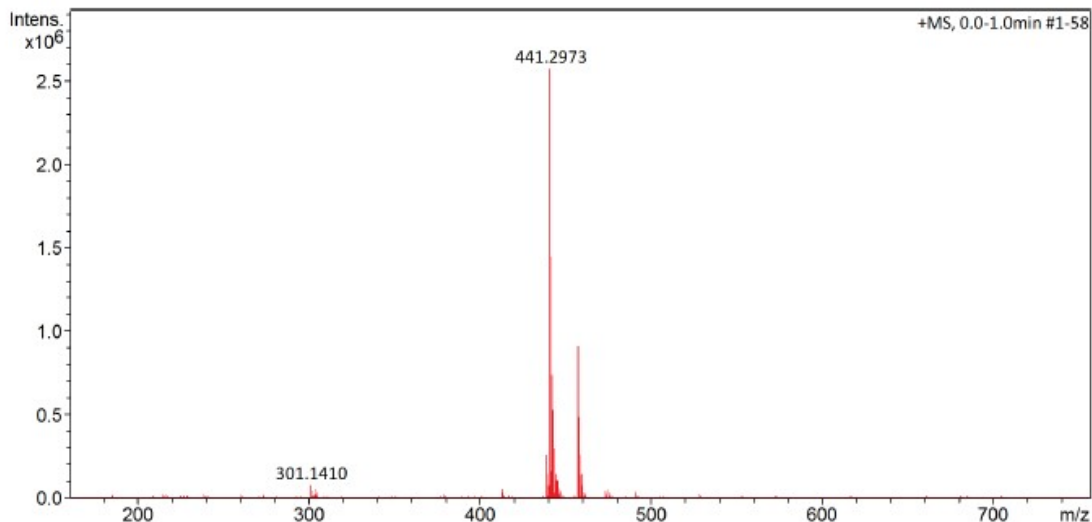

| #  | m/z      | Res.  | S/N     | I       | I%    | FWHM   |
|----|----------|-------|---------|---------|-------|--------|
| 1  | 215.1254 | 31616 | 2427.0  | 20262   | 0.8   | 0.0068 |
| 2  | 239.1618 | 32210 | 1878.1  | 18043   | 0.7   | 0.0074 |
| 3  | 261.1309 | 33484 | 1391.3  | 15941   | 0.6   | 0.0078 |
| 4  | 273.1673 | 34016 | 1378.6  | 18075   | 0.7   | 0.0080 |
| 5  | 301.1410 | 35633 | 4652.0  | 79610   | 3.1   | 0.0085 |
| 6  | 303.2294 | 35309 | 1004.8  | 17943   | 0.7   | 0.0086 |
| 7  | 304.2611 | 34852 | 1988.9  | 36165   | 1.4   | 0.0087 |
| 8  | 379.3183 | 35238 | 499.1   | 18545   | 0.7   | 0.0108 |
| 9  | 413.2662 | 36062 | 1287.4  | 57439   | 2.2   | 0.0115 |
| 10 | 414.2697 | 37105 | 348.2   | 15608   | 0.6   | 0.0112 |
| 11 | 439.2818 | 36346 | 5104.2  | 260467  | 10.1  | 0.0121 |
| 12 | 440.2853 | 37042 | 1474.9  | 75686   | 2.9   | 0.0119 |
| 13 | 441.2973 | 35925 | 49891.7 | 2574060 | 100.0 | 0.0123 |
| 14 | 441.4225 | 65332 | 780.6   | 40293   | 1.6   | 0.0068 |
| 15 | 442.3008 | 35829 | 14337.3 | 742140  | 28.8  | 0.0123 |
| 16 | 443.3120 | 30803 | 10330.2 | 535598  | 20.8  | 0.0144 |
| 17 | 444.3162 | 34391 | 2842.7  | 147555  | 5.7   | 0.0129 |
| 18 | 445.3279 | 31485 | 2086.9  | 108496  | 4.2   | 0.0141 |
| 19 | 446.3319 | 34200 | 564.2   | 29395   | 1.1   | 0.0131 |
| 20 | 447.3438 | 31800 | 548.0   | 28578   | 1.1   | 0.0141 |
| 21 | 455.2767 | 35449 | 348.6   | 18609   | 0.7   | 0.0128 |
| 22 | 457.2923 | 36070 | 17095.4 | 916725  | 35.6  | 0.0127 |
| 23 | 458.2957 | 36396 | 4867.9  | 261528  | 10.2  | 0.0126 |
| 24 | 459.3067 | 28837 | 2757.5  | 148377  | 5.8   | 0.0159 |
| 25 | 460.3110 | 33306 | 741.2   | 39964   | 1.6   | 0.0138 |
| 26 | 461.3226 | 30490 | 488.8   | 26414   | 1.0   | 0.0151 |
| 27 | 473.2873 | 36866 | 793.4   | 43638   | 1.7   | 0.0128 |
| 28 | 475.3028 | 35293 | 698.4   | 38480   | 1.5   | 0.0135 |
| 29 | 477.3181 | 32354 | 279.9   | 15444   | 0.6   | 0.0148 |
| 30 | 491.2979 | 37431 | 605.9   | 33735   | 1.3   | 0.0131 |

21276.d

Bruker Compass DataAnalysis 4.3

printed: 17-Nov-25 9:07:09 AM

by: n/a

Page 1 of 1

**Figure 27** MS spectra of the product mixture after incubation of DHA-like MEL **3** with 15-LOX-1.

# Elemental Analysis Report

## Analysis Info

Sample Name MB-3-055-A  
Method ESI\_pos\_50\_1500\_os.m

Acquisition Date 17-Nov-25 9:02:29 AM  
Analysis Name D:\Data\maxis2025\21276.d

## Acquisition Parameter

|             |            |                      |        |                  |           |
|-------------|------------|----------------------|--------|------------------|-----------|
| Source Type | ESI        | Set Capillary        | 3500 V | Set Nebulizer    | 0.5 Bar   |
| Focus       | Not active | Set End Plate Offset | -500 V | Set Dry Heater   | 200 °C    |
| Scan Begin  | 50 m/z     | Set Charging Voltage | 2000 V | Set Dry Gas      | 4.0 l/min |
| Scan End    | 1500 m/z   | Set Corona           | 0 nA   | Set Divert Valve | Source    |
|             |            |                      |        | Set APCI Heater  | 0 °C      |

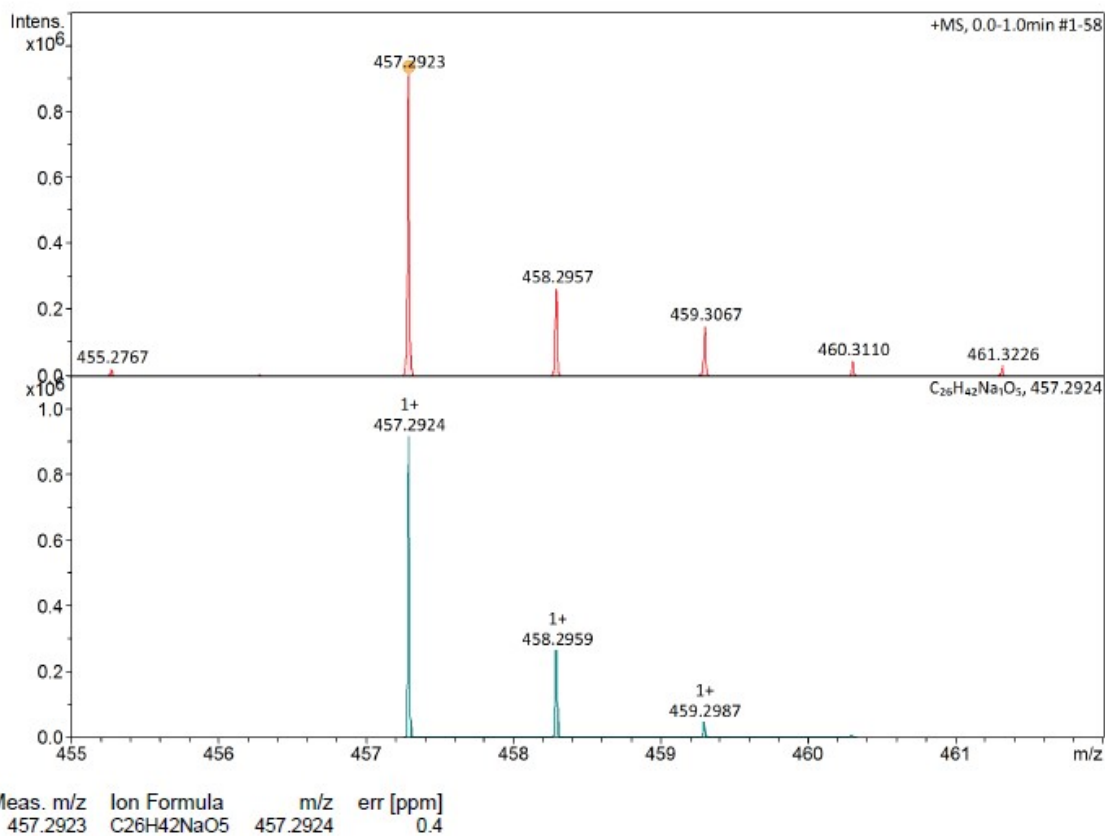

Figure 28 HRMS spectra of the formed product after incubation of DHA-like MEL 3 with 15-LOX-1.

# Mass Spectrum List Report

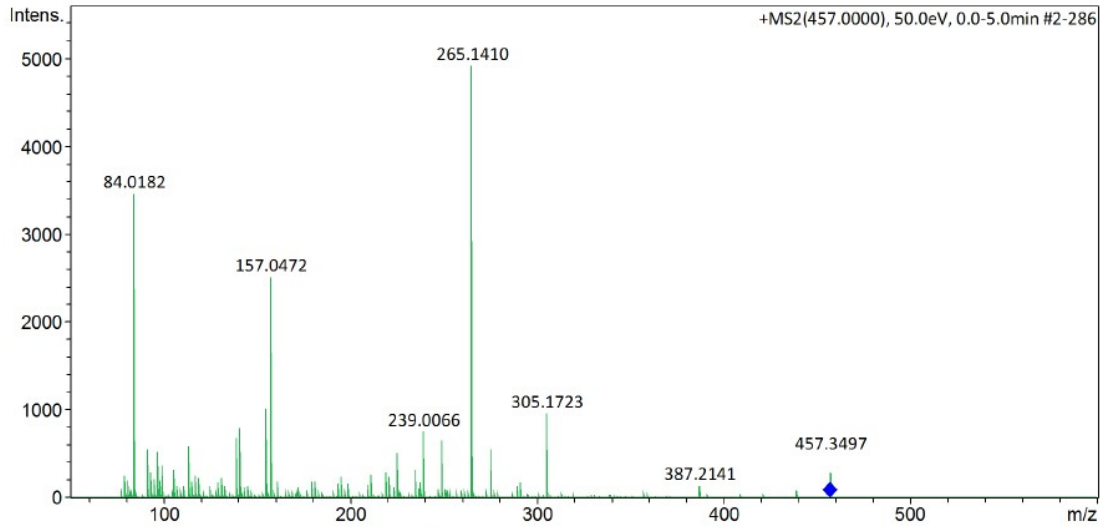

| #  | m/z      | Res.  | S/N   | I    | I %   | FWHM   |
|----|----------|-------|-------|------|-------|--------|
| 1  | 79.0543  | 23123 | 12.9  | 253  | 5.1   | 0.0034 |
| 2  | 84.0182  | 23887 | 177.0 | 3461 | 70.3  | 0.0035 |
| 3  | 91.0543  | 25413 | 28.4  | 553  | 11.2  | 0.0036 |
| 4  | 93.0700  | 24533 | 15.2  | 297  | 6.0   | 0.0038 |
| 5  | 97.0260  | 26130 | 15.9  | 308  | 6.3   | 0.0037 |
| 6  | 97.0472  | 25621 | 26.8  | 520  | 10.6  | 0.0038 |
| 7  | 99.0629  | 26066 | 18.9  | 365  | 7.4   | 0.0038 |
| 8  | 105.0699 | 26329 | 16.5  | 318  | 6.5   | 0.0040 |
| 9  | 113.0210 | 27372 | 30.7  | 590  | 12.0  | 0.0041 |
| 10 | 117.0699 | 28315 | 13.2  | 253  | 5.1   | 0.0041 |
| 11 | 119.0856 | 28750 | 11.9  | 228  | 4.6   | 0.0041 |
| 12 | 139.0941 | 30311 | 36.4  | 682  | 13.9  | 0.0046 |
| 13 | 141.0733 | 28156 | 42.5  | 797  | 16.2  | 0.0050 |
| 14 | 155.0679 | 30462 | 55.0  | 1019 | 20.7  | 0.0051 |
| 15 | 157.0472 | 30269 | 136.3 | 2516 | 51.1  | 0.0052 |
| 16 | 195.0993 | 33467 | 13.5  | 240  | 4.9   | 0.0058 |
| 17 | 211.0941 | 34137 | 15.6  | 271  | 5.5   | 0.0062 |
| 18 | 219.1567 | 32151 | 17.2  | 295  | 6.0   | 0.0068 |
| 19 | 221.1360 | 32902 | 14.0  | 240  | 4.9   | 0.0067 |
| 20 | 225.1098 | 33017 | 30.2  | 516  | 10.5  | 0.0068 |
| 21 | 235.1305 | 33595 | 19.1  | 322  | 6.5   | 0.0070 |
| 22 | 239.0066 | 34721 | 44.8  | 753  | 15.3  | 0.0069 |
| 23 | 239.1254 | 34584 | 21.1  | 354  | 7.2   | 0.0069 |
| 24 | 249.0021 | 35759 | 39.1  | 649  | 13.2  | 0.0070 |
| 25 | 249.1672 | 34347 | 30.7  | 508  | 10.3  | 0.0073 |
| 26 | 265.1410 | 35738 | 303.3 | 4924 | 100.0 | 0.0074 |
| 27 | 275.1618 | 35834 | 33.9  | 546  | 11.1  | 0.0077 |
| 28 | 305.1723 | 37423 | 61.0  | 963  | 19.6  | 0.0082 |
| 29 | 457.2922 | 37593 | 17.3  | 272  | 5.5   | 0.0122 |
| 30 | 457.3497 | 39213 | 18.9  | 298  | 6.1   | 0.0117 |

Figure 29 MS/MS spectra of the peak at 457.2923 m/z.

# Elemental Analysis Report

**Analysis Info**  
Sample Name MB-3-055-A\_1  
Method ESI\_pos\_50\_1500\_os.m  
Acquisition Date 17-Nov-25 9:51:35 AM  
Analysis Name D:\Data\maxis2025\21276\_1.d

**Acquisition Parameter**

|             |            |                      |        |                  |           |
|-------------|------------|----------------------|--------|------------------|-----------|
| Source Type | ESI        | Set Capillary        | 3500 V | Set Nebulizer    | 0.5 Bar   |
| Focus       | Not active | Set End Plate Offset | -500 V | Set Dry Heater   | 200 °C    |
| Scan Begin  | 50 m/z     | Set Charging Voltage | 2000 V | Set Dry Gas      | 4.0 l/min |
| Scan End    | 1500 m/z   | Set Corona           | 0 nA   | Set Divert Valve | Source    |
|             |            |                      |        | Set APCI Heater  | 0 °C      |

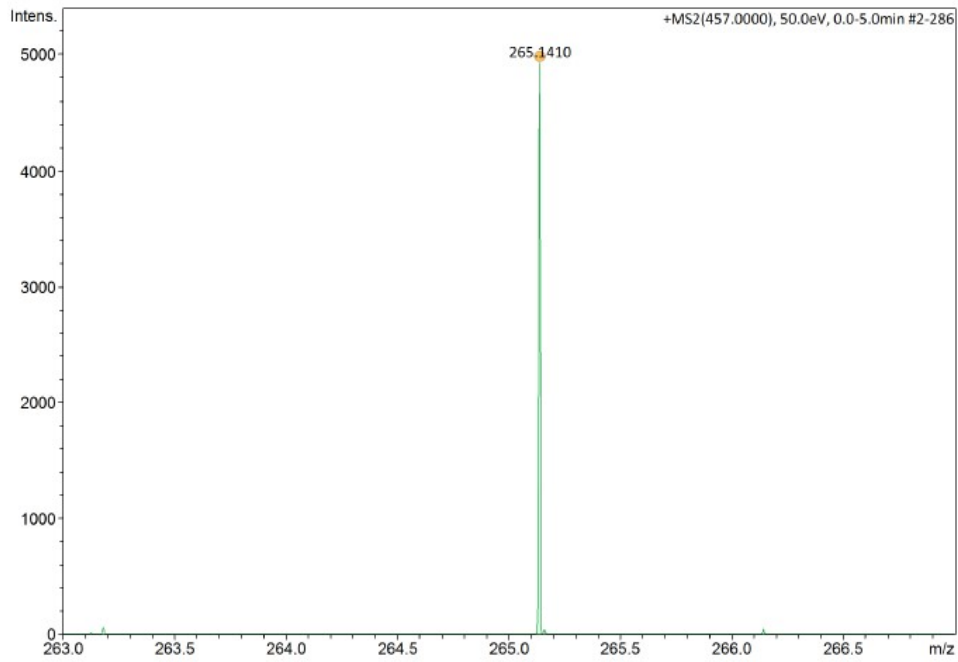

| Meas. m/z | Ion Formula | m/z      | err [ppm] |
|-----------|-------------|----------|-----------|
| 84.0182   | C2H2N3O     | 84.0192  | 11.8      |
| 157.0472  | C3H5N6O2    | 157.0468 | -2.1      |
|           | C5H7N3O3    | 157.0482 | 6.4       |
|           | C5H10NaO4   | 157.0471 | -0.3      |
| 265.1410  | C11H17N6O2  | 265.1408 | -0.8      |
|           | C13H22NaO4  | 265.1410 | 0.2       |
| 457.3497  | C22H45N6O4  | 457.3497 | -0.1      |
|           | C23H44N7NaO | 457.3500 | 0.5       |
|           | C24H50NaO6  | 457.3500 | 0.6       |

Figure 30 HRMS analysis of the MS/MS spectra.

---

**Acquisition Parameter**

|             |            |                      |          |                  |           |
|-------------|------------|----------------------|----------|------------------|-----------|
| Source Type | ESI        | Ion Polarity         | Positive | Set Nebulizer    | 0.5 Bar   |
| Focus       | Not active | Set Capillary        | 3500 V   | Set Dry Heater   | 200 °C    |
| Scan Begin  | 50 m/z     | Set End Plate Offset | -500 V   | Set Dry Gas      | 4.0 l/min |
| Scan End    | 1500 m/z   | Set Charging Voltage | 2000 V   | Set Divert Valve | Waste     |
|             |            | Set Corona           | 0 nA     | Set APCI Heater  | 0 °C      |

---

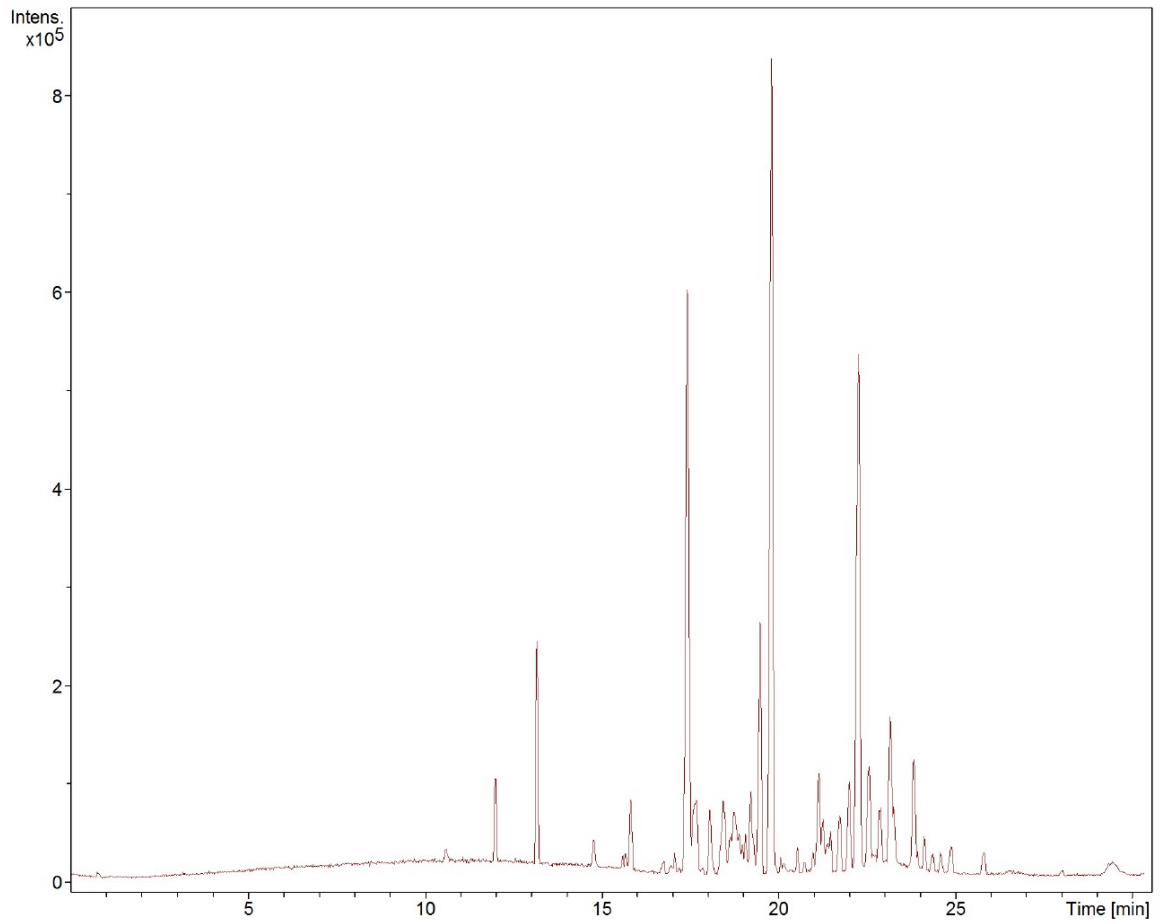

**Figure 31** Base Peak Chromatogram after HPLC-MS.

**Acquisition Parameter**

|             |            |                      |          |                  |           |
|-------------|------------|----------------------|----------|------------------|-----------|
| Source Type | ESI        | Ion Polarity         | Positive | Set Nebulizer    | 0.5 Bar   |
| Focus       | Not active | Set Capillary        | 3500 V   | Set Dry Heater   | 200 °C    |
| Scan Begin  | 50 m/z     | Set End Plate Offset | -500 V   | Set Dry Gas      | 4.0 l/min |
| Scan End    | 1500 m/z   | Set Charging Voltage | 2000 V   | Set Divert Valve | Waste     |
|             |            | Set Corona           | 0 nA     | Set APCI Heater  | 0 °C      |

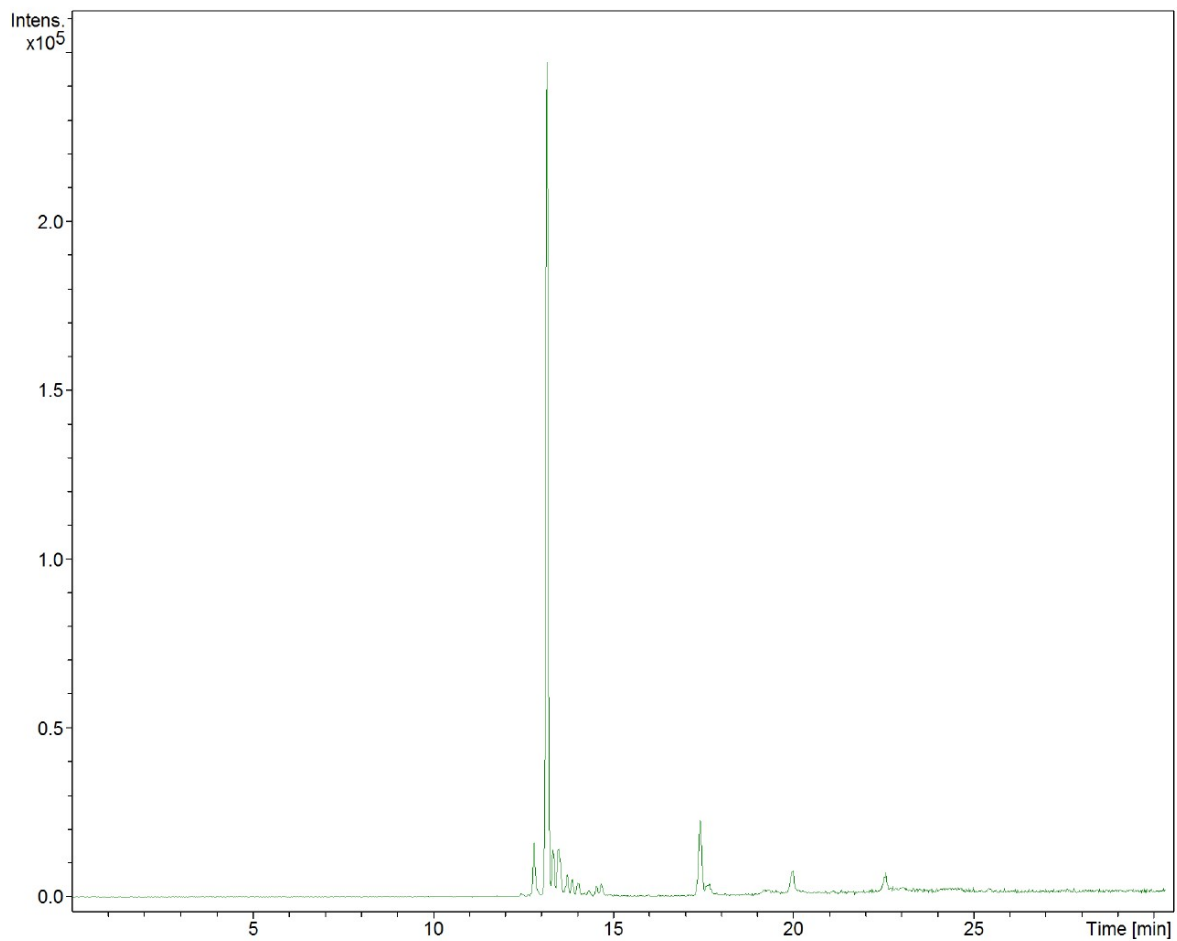

**Figure 32** Extracted Ion Chromatogram for  $m/z$  457.2944.

---

**Acquisition Parameter**

|             |            |                      |          |                  |           |
|-------------|------------|----------------------|----------|------------------|-----------|
| Source Type | ESI        | Ion Polarity         | Positive | Set Nebulizer    | 0.5 Bar   |
| Focus       | Not active | Set Capillary        | 3500 V   | Set Dry Heater   | 200 °C    |
| Scan Begin  | 50 m/z     | Set End Plate Offset | -500 V   | Set Dry Gas      | 4.0 l/min |
| Scan End    | 1500 m/z   | Set Charging Voltage | 2000 V   | Set Divert Valve | Waste     |
|             |            | Set Corona           | 0 nA     | Set APCI Heater  | 0 °C      |

---

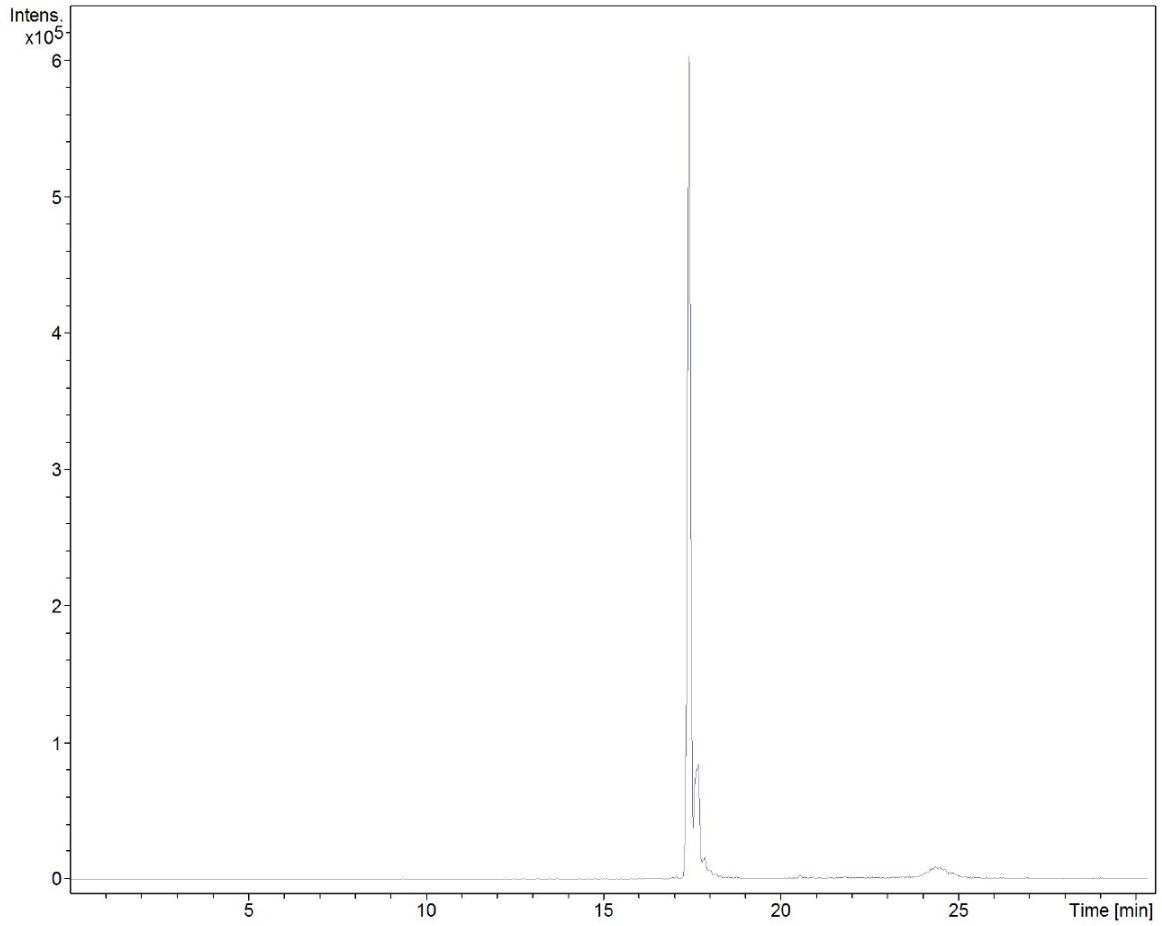

**Figure 33** Extracted Ion Chromatogram for  $m/z$  441.2991.

## References:

1. R. Tyagi, B. Shimpukade, S. Blättermann, E. Kostenis and T. Ulven, *Med. Chem. Commun.*, 2012, **3**, 195-198.
2. K. G. Primdahl, Y. Stenstrøm, T. V. Hansen and A. Vik, *Chem. Phys. Lipids*, 2016, **196**, 1-4.
3. S. Flock, M. Lundquist and L. Skattebøl, *Acta Chem. Scand.*, 1999, **53**, 436-445.
4. N. Aizdaicher, A. Imbs, N. Latyshev, D. Kuklev and V. Bezuglov, *Phytochemistry*, 1992, **31**, 2401-2403.
5. M. G. Jakobsen, A. Vik and T. V. Hansen, *Tetrahedron Lett.*, 2012, **53**, 5837-5839.
6. G. Gjessing, L.-I. G. Johnsen, S. G. Antonsen, J. M. J. Nolsøe, Y. Stenstrøm and T. V. Hansen, *Molecules*, 2022, **27**, 2295.
7. S. Flock, A. K. Holmeide and L. Skattebøl, *Synth. Commun.*, 2007, **37**, 4005-4015.
8. S. Sigurjónsson, E. Lúthersson, H. G. Gudmundsson, H. Haraldsdóttir, L. Kristinsdóttir and G. G. Haraldsson, *J. Org. Chem.*, 2022, **87**, 12306-12314.
9. S. Sigurjónsson, E. Lúthersson, C. D. Magnússon, H. G. Gudmundsson, E. Das and G. G. Haraldsson, *J. Org. Chem.*, 2022, **87**, 14623-14635.
10. S. Passaro, G. Corso, J. Wohlwend, M. Reveiz, S. Thaler, V. R. Somnath, N. Getz, T. Portnoi, J. Roy, H. Stark, D. Kwabi-Addo, D. Beaini, T. Jaakkola and R. Barzilay, *bioRxiv*, 2025.
11. G. M. Sastry, M. Adzhigirey, T. Day, R. Annabhimoju and W. Sherman, *J. Comput. Aided Mol. Des.*, 2013, **27**, 221-234.
12. M. A. Lomize, I. D. Pogozeva, H. Joo, H. I. Mosberg and A. L. Lomize, *Nucleic Acids Res.*, 2011, **40**, D370-D376.
13. K. J. Bowers, E. Chow, H. Xu, R. O. Dror, M. P. Eastwood, B. A. Gregersen, J. L. Klepeis, I. Kolossvary, M. A. Moraes, F. D. Sacerdoti, J. K. Salmon, Y. Shan and D. E. Shaw, presented in part at the Proceedings of the 2006 ACM/IEEE conference on Supercomputing, Tampa, Florida, 2006.
14. C. Lu, C. Wu, D. Ghoreishi, W. Chen, L. Wang, W. Damm, G. A. Ross, M. K. Dahlgren, E. Russell, C. D. Von Bargen, R. Abel, R. A. Friesner and E. D. Harder, *J. Chem. Theory Comput.*, 2021, **17**, 4291-4300.
15. R. Farid, T. Day, R. A. Friesner and R. A. Pearlstein, *Bioorg. Med. Chem.*, 2006, **14**, 3160-3173.
16. W. Sherman, H. S. Beard and R. Farid, *Chem. Biol. Drug Des.*, 2006, **67**, 83-84.
17. W. Sherman, T. Day, M. P. Jacobson, R. A. Friesner and R. Farid, *J. Med. Chem.*, 2006, **49**, 534-553.
